# Supplementary material for: Gene expression analysis of membrane transporters and drug-metabolizing enzymes in the lung of healthy and COPD subjects
Source: PubMed Central journal article supplement — Pharmacol Res Perspect. 2014 Jun 12;2(4):e00054. doi: 10.1002/prp2.54 (PMC4186441; doi:10.1002/prp2.54), 2014-06-12

**Title:** *Gene expression analysis of membrane transporters and drug metabolizing enzymes in the lung of healthy and COPD subjects.*

**Authors:** *Tove Berg, Tove Hegelund Myrbäck, Marita Olsson, Janeric Seidegård, Viktoria Werkström, Xiao-Hong Zhou, Johan Grunewald, Lena Gustavsson, Magnus Nord*

**Journal:** *Drug metabolism and Disposition*

#### SUPPLEMENTARY INFORMATION (SI)

**SI. Figure 1. Individual expression pattern of differential expressed genes encoding membrane transporters.** Graphs show expression levels of individual genes encoding membrane transporters regarding differential expression between central airways and peripheral tissue. Black circles denote COPD patients and unfilled circles denote healthy subjects.

**SI. Figure 2. Individual expression pattern of differential expressed genes encoding drug metabolizing enzymes.** Graphs show expression levels of individual genes encoding drug metabolizing enzymes regarding differential expression between central airways and peripheral tissue. Black circles denote COPD patients and unfilled circles denote healthy subjects.

SI. Table 1. TLDA probes and median Ct-values for membrane transporters and housekeeping genes in healthy and COPD lung.

| <i>Gene</i>             | Applied Biosystems<br>ID | Healthy |            | COPD    |            |
|-------------------------|--------------------------|---------|------------|---------|------------|
|                         |                          | Central | Peripheral | Central | Peripheral |
| <i>ABC Transporters</i> |                          |         |            |         |            |
| <i>ABCA1</i>            | Hs00194045_m1            | 28.73   | 27.97      | 28.09   | 28.07      |
| <i>ABCA2</i>            | Hs00242232_m1            | 30.40   | 31.22      | 29.83   | 29.84      |
| <i>ABCA3</i>            | Hs00184543_m1            | 27.21   | 27.15      | 26.97   | 25.55      |
| <i>ABCA4</i>            | Hs00184367_m1            | 33.21   | -          | 33.42   | 34.88      |
| <i>ABCA5</i>            | Hs00363322_m1            | 28.87   | 30.75      | 28.36   | 28.88      |
| <i>ABCA6</i>            | Hs00365329_m1            | 29.25   | 30.51      | 28.41   | 28.41      |
| <i>ABCA7</i>            | Hs00185303_m1            | 30.15   | 32.82      | 29.85   | 31.10      |
| <i>ABCA9</i>            | Hs00329320_m1            | 30.11   | 30.83      | 28.46   | 28.97      |
| <i>ABCA10</i>           | Hs00365268_m1            | 31.12   | 33.11      | 29.92   | 30.99      |
| <i>ABCA12</i>           | Hs00292421_m1            | 34.44   | -          | 32.44   | -          |
| <i>ABCB1</i>            | Hs00184491_m1            | 33.33   | 33.41      | 32.02   | 31.82      |
| <i>ABCB4</i>            | Hs00240956_m1            | -       | -          | 34.51   | 34.39      |
| <i>ABCB5</i>            | Hs00698751_m1            | -       | -          | -       | -          |
| <i>ABCB6</i>            | Hs00180568_m1            | 28.77   | 31.84      | 28.97   | 29.68      |
| <i>ABCB7</i>            | Hs00188776_m1            | 29.51   | 30.09      | 28.17   | 28.28      |
| <i>ABCB8</i>            | Hs00185159_m1            | 29.01   | 29.84      | 28.84   | 29.06      |
| <i>ABCB9</i>            | Hs00608640_m1            | 31.65   | 33.88      | 31.90   | 31.82      |
| <i>ABCB10</i>           | Hs00429240_m1            | 30.38   | 31.23      | 29.51   | 29.89      |
| <i>ABCC1</i>            | Hs00219905_m1            | 29.43   | 30.89      | 28.93   | 29.45      |
| <i>ABCC2</i>            | Hs00166123_m1            | 34.77   | 34.74      | 34.50   | 34.34      |
| <i>ABCC3</i>            | Hs00358656_m1            | 31.01   | 30.80      | 29.80   | 30.25      |
| <i>ABCC4</i>            | Hs00195260_m1            | 30.72   | 31.08      | 29.69   | 29.03      |
| <i>ABCC5</i>            | Hs00194701_m1            | 30.46   | 31.83      | 30.45   | 31.19      |

|               |               |       |       |       |       |
|---------------|---------------|-------|-------|-------|-------|
| <i>ABCC6</i>  | Hs01077866_m1 | 29.59 | 31.99 | 29.45 | 29.25 |
| <i>ABCC7</i>  | Hs00357011_m1 | 32.72 | -     | -     | -     |
| <i>ABCC8</i>  | Hs00165861_m1 | 29.16 | 30.85 | 28.94 | 28.32 |
| <i>ABCC9</i>  | Hs00245832_m1 | 29.43 | 30.89 | 28.93 | 29.45 |
| <i>ABCC10</i> | Hs00375716_m1 | 29.58 | 30.49 | 29.00 | 29.82 |
| <i>ABCC11</i> | Hs00261546_m1 | -     | -     | -     | -     |
| <i>ABCC12</i> | Hs00264354_m1 | -     | -     | -     | -     |
| <i>ABCG1</i>  | Hs01555193_m1 | 28.36 | 29.23 | 27.94 | 27.77 |
| <i>ABCG2</i>  | Hs01053790_m1 | 33.70 | 34.37 | 32.50 | 31.23 |
| <i>ABCG4</i>  | Hs00967540_m1 | -     | -     | -     | -     |
| <i>ABCG5</i>  | Hs03037375_m1 | -     | -     | -     | -     |
| <i>ABCG8</i>  | Hs02880035_m1 | -     | -     | -     | -     |

---

*Solute Carriers*

---

|                 |               |       |       |       |       |
|-----------------|---------------|-------|-------|-------|-------|
| <i>SLC47A1</i>  | Hs00217320_m1 | 31.31 | 31.75 | 30.48 | 29.07 |
| <i>SLC47A2</i>  | Hs00945650_m1 | -     | -     | -     | -     |
| <i>SLC15A1</i>  | Hs00192639_m1 | -     | -     | 34.94 | -     |
| <i>SLC15A2</i>  | Hs01113665_m1 | 28.91 | 31.19 | 28.78 | 29.50 |
| <i>SLC16A1</i>  | Hs00161826_m1 | 31.20 | 33.41 | 30.58 | 30.66 |
| <i>SLC16A3</i>  | Hs01108070_m1 | 32.50 | 32.91 | 31.68 | 31.85 |
| <i>SLC16A4</i>  | Hs00190794_m1 | 29.91 | 31.55 | 29.39 | 28.60 |
| <i>SLC16A7</i>  | Hs00190974_m1 | -     | -     | -     | -     |
| <i>SLC19A1</i>  | Hs00953345_m1 | 31.13 | 31.75 | 30.74 | 29.46 |
| <i>SLC19A2</i>  | Hs00294767_m1 | 30.25 | 30.49 | 29.05 | 28.45 |
| <i>SLC19A3</i>  | Hs00228858_m1 | 31.38 | 31.82 | 30.28 | 28.65 |
| <i>SLC22A1</i>  | Hs00427554_m1 | 33.62 | 34.09 | 33.08 | 33.18 |
| <i>SLC22A11</i> | Hs00945829_m1 | -     | -     | -     | -     |
| <i>SLC22A2</i>  | Hs00161893_m1 | -     | -     | -     | -     |

|                |               |       |       |       |       |
|----------------|---------------|-------|-------|-------|-------|
| <i>SLC22A3</i> | Hs01009568_m1 | 30.55 | 30.07 | 29.10 | 28.09 |
| <i>SLC22A4</i> | Hs00268200_m1 | 30.02 | 33.66 | 29.64 | 32.26 |
| <i>SLC22A5</i> | Hs00161895_m1 | 30.78 | 32.91 | 30.04 | 30.87 |
| <i>SLC22A6</i> | Hs00191220_m1 | -     | -     | -     | -     |
| <i>SLC22A7</i> | Hs00198527_m1 | -     | -     | -     | -     |
| <i>SLC22A8</i> | Hs00188599_m1 | -     | -     | -     | -     |
| <i>SLC22A9</i> | Hs00971064_m1 | -     | -     | -     | -     |
| <i>SLC28A1</i> | Hs00188418_m1 | 34.85 | -     | -     | -     |
| <i>SLC28A2</i> | Hs00188407_m1 | 33.86 | -     | 34.29 | -     |
| <i>SLC28A3</i> | Hs00910439_m1 | 31.25 | 34.42 | 30.58 | 32.49 |
| <i>SLC29A1</i> | Hs00191940_m1 | 27.80 | 28.41 | 27.43 | 27.03 |
| <i>SLC29A2</i> | Hs00155426_m1 | 31.53 | 32.11 | 30.72 | 30.95 |
| <i>SLC29A3</i> | Hs00983219_m1 | 30.54 | 30.57 | 29.54 | 29.65 |
| <i>SLC29A4</i> | Hs00542001_m1 | 31.23 | 34.31 | 32.04 | 32.05 |
| <i>SLC2A1</i>  | Hs00892681_m1 | 28.17 | 32.32 | 27.64 | 29.91 |
| <i>SLC31A1</i> | Hs00741015_m1 | 29.56 | 32.67 | 28.74 | 28.88 |
| <i>SLC31A2</i> | Hs00156984_m1 | 28.63 | 28.77 | 27.52 | 26.77 |
| <i>SLC36A4</i> | Hs00403119_m1 | 29.16 | 30.41 | 28.87 | 28.64 |
| <i>SLC3A2</i>  | Hs00374243_m1 | 28.82 | 30.67 | 28.04 | 27.70 |
| <i>SLC51A</i>  | Hs00380895_m1 | 30.26 | 33.20 | 28.96 | 33.60 |
| <i>SLC51B</i>  | Hs00418306_m1 | 32.49 | 33.10 | 30.69 | 31.16 |
| <i>SLC6A2</i>  | Hs01567442_m1 | -     | -     | -     | -     |
| <i>SLC6A3</i>  | Hs00168988_m1 | -     | 34.11 | -     | -     |
| <i>SLC6A4</i>  | Hs00169010_m1 | 28.06 | 28.28 | 34.98 | 27.27 |
| <i>SLC7A1</i>  | Hs00931450_m1 | 29.10 | 31.97 | 27.76 | 29.30 |
| <i>SLC7A5</i>  | Hs00185826_m1 | 31.36 | 32.45 | 30.08 | 31.15 |
| <i>SLC7A6</i>  | Hs00187757_m1 | 29.25 | 31.05 | 28.84 | 28.89 |

|                                                              |               |       |       |       |       |
|--------------------------------------------------------------|---------------|-------|-------|-------|-------|
| <i>SLC7A8</i>                                                | Hs00794796_m1 | 30.51 | 30.47 | 29.73 | 29.06 |
| <i>SLC7A11</i>                                               | Hs00204928_m1 | 32.51 | -     | 32.28 | 31.91 |
| <hr/> <i>Solute Carrier Organic Anion Transporters</i> <hr/> |               |       |       |       |       |
| <i>SLCO1A2</i>                                               | Hs00366488_m1 | 32.63 | 34.30 | 33.05 | 32.65 |
| <i>SLCO1B1</i>                                               | Hs00272374_m1 | -     | -     | -     | -     |
| <i>SLCO1B3</i>                                               | Hs00251986_m1 | 34.70 | -     | 33.68 | -     |
| <i>SLCO1C1</i>                                               | Hs00213714_m1 | -     | -     | -     | -     |
| <i>SLCO2B1</i>                                               | Hs00200670_m1 | 28.75 | 29.62 | 27.33 | 26.03 |
| <i>SLCO3A1</i>                                               | Hs00203184_m1 | 30.96 | 31.01 | 30.26 | 29.90 |
| <i>SLCO4A1</i>                                               | Hs00249583_m1 | 28.65 | 27.97 | 31.43 | 29.87 |
| <i>SLCO4C1</i>                                               | Hs00698884_m1 | 31.20 | 31.65 | 30.01 | 29.10 |
| <i>SLCO5A1</i>                                               | Hs00229597_m1 | 32.74 | 32.73 | 32.68 | 32.34 |
| <i>SLCO6A1</i>                                               | Hs00542846_m1 | -     | -     | -     | -     |
| <hr/> <i>Copper-Transporting ATPases</i> <hr/>               |               |       |       |       |       |
| <i>ATP7A</i>                                                 | Hs00921963_m1 | 31.65 | 32.67 | 30.38 | 30.35 |
| <i>ATP7B</i>                                                 | Hs00163739_m1 | 29.33 | 31.39 | 28.80 | 30.33 |
| <hr/> <i>Housekeeping genes</i> <hr/>                        |               |       |       |       |       |
| 18S                                                          | Hs99999901_s1 | 15.19 | 16.08 | 15.03 | 14.81 |
| <i>ACTB</i>                                                  | Hs99999903_m1 | 22.30 | 23.64 | 21.87 | 20.99 |
| <i>B2M</i>                                                   | Hs00984230_m1 | 23.30 | 23.81 | 22.23 | 21.55 |
| <i>RPLP0</i>                                                 | Hs99999902_m1 | 23.29 | 26.46 | 23.07 | 23.25 |
| <i>UBC</i>                                                   | Hs00824723_m1 | 25.13 | 26.39 | 25.07 | 24.65 |

Table listing gene, Applied Biosystem assay ID, and median Ct-values for mRNA of membrane transporters and housekeeping genes in healthy and COPD lung. Median Ct-value of  $\geq 35$  is arbitrary set as cut off value.

SI. Table 2. TLDA probes and median Ct-values for drug metabolizing enzymes, transcription factors, and cell specific markers in healthy and COPD lung.

| <i>Gene</i>                    | Applied Biosystems<br>ID | Healthy |            | COPD    |            |  |
|--------------------------------|--------------------------|---------|------------|---------|------------|--|
|                                |                          | Central | Peripheral | Central | Peripheral |  |
| <i>Cytochrome P450 enzymes</i> |                          |         |            |         |            |  |
| <i>CYP1A1</i>                  | Hs00153120_m1            | -       | -          | -       | -          |  |
| <i>CYP1A2</i>                  | Hs00167927_m1            | -       | -          | -       | -          |  |
| <i>CYP1B1</i>                  | Hs00164383_m1            | 28.62   | 29.24      | 28.75   | 28.52      |  |
| <i>CYP2A6</i>                  | Hs00868409_s1*           | 31.17   | 32.19      | 33.31   | 32.53      |  |
| <i>CYP2A13</i>                 | Hs00426372_m1            | 31.70   | 32.77      | -       | 34.23      |  |
| <i>CYP2B6</i>                  | Hs03044634_m1            | 27.91   | 28.38      | 28.19   | 29.07      |  |
| <i>CYP2C19</i>                 | Hs00426380_m1            | 34.09   | 33.22      | -       | -          |  |
| <i>CYP2C9</i>                  | Hs00426397_m1            | 32.94   | 32.66      | -       | -          |  |
| <i>CYP2D6</i>                  | Hs02576167_m1            | 34.38   | -          | -       | -          |  |
| <i>CYP2E1</i>                  | Hs00559368_m1            | 32.43   | 32.16      | 32.54   | 32.38      |  |
| <i>CYP2F1</i>                  | Hs00167949_m1            | 28.72   | 28.44      | 32.56   | 31.37      |  |
| <i>CYP2J2</i>                  | Hs00951113_m1            | 31.50   | 31.37      | 33.05   | 32.42      |  |
| <i>CYP2S1</i>                  | Hs00258076_m1            | 28.86   | 28.49      | 30.63   | 30.24      |  |
| <i>CYP3A4</i>                  | Hs00604506_m1            | -       | -          | -       | -          |  |
| <i>CYP3A5</i>                  | Hs01070905_m1            | 34.10   | 34.80      | 33.30   | 33.46      |  |
| <i>CYP4B1</i>                  | Hs00167970_m1            | 25.84   | 24.53      | 26.36   | 24.91      |  |
| <i>CYP4F2</i>                  | Hs00426608_m1            | -       | -          | -       | -          |  |
| <i>Epoxide hydrolases</i>      |                          |         |            |         |            |  |
| <i>EPHX1</i>                   | Hs01116806_m1            | 26.46   | 26.07      | 27.07   | 25.76      |  |

|              |               |       |       |       |       |
|--------------|---------------|-------|-------|-------|-------|
| <i>EPHX2</i> | Hs00157403_m1 | 29.90 | 30.06 | 31.37 | 30.55 |
| <i>EPHX3</i> | Hs00227184_m1 | 33.17 | 32.59 | 33.71 | 32.92 |
| <i>EPHX4</i> | Hs00543140_m1 | 33.23 | 32.91 | 33.47 | 33.54 |

---

*Flavin monooxygenases*

|             |               |       |       |       |       |
|-------------|---------------|-------|-------|-------|-------|
| <i>FMO1</i> | Hs00266654_m1 | 33.73 | 34.18 | 34.38 | 34.48 |
| <i>FMO2</i> | Hs00155158_m1 | 27.77 | 26.57 | 27.61 | 26.31 |
| <i>FMO3</i> | Hs00199368_m1 | 29.78 | 30.11 | 30.74 | 30.49 |
| <i>FMO4</i> | Hs00157614_m1 | 31.80 | 30.98 | 32.95 | 31.44 |
| <i>FMO5</i> | Hs00356233_m1 | 26.52 | 27.29 | 27.56 | 28.03 |

---

*Glutathione S-Transferases*

|              |                |       |       |       |       |
|--------------|----------------|-------|-------|-------|-------|
| <i>GSTA1</i> | Hs00275575_m1  | 26.30 | 26.85 | 31.30 | 28.32 |
| <i>GSTA2</i> | Hs00747232_mH  | 29.19 | 29.82 | 33.31 | 31.61 |
| <i>GSTA3</i> | Hs00374175_m1  | 32.23 | 33.08 | 34.43 | 33.94 |
| <i>GSTA4</i> | Hs00155308_m1  | 29.45 | 28.70 | 29.14 | 28.47 |
| <i>GSTA5</i> | Hs00604085_m1  | -     | -     | -     | -     |
| <i>GSTK1</i> | Hs00210861_m1  | 26.02 | 25.60 | 25.87 | 25.79 |
| <i>GSTM1</i> | Hs02341469_m1  | -     | -     | -     | -     |
| <i>GSTM2</i> | Hs00265266_g1* | 29.09 | 28.18 | 28.94 | 28.45 |
| <i>GSTM3</i> | Hs00356079_m1  | 29.71 | 29.38 | 29.84 | 29.03 |
| <i>GSTM4</i> | Hs00426432_m1  | 31.01 | 30.95 | 31.38 | 31.25 |
| <i>GSTM5</i> | Hs00757076_m1  | 32.21 | 31.95 | 32.62 | 30.71 |
| <i>GSTO1</i> | Hs00818731_m1  | 28.49 | 27.62 | 27.24 | 26.49 |
| <i>GSTO2</i> | Hs00826661_m1  | 33.18 | 32.23 | 33.08 | 33.16 |
| <i>GSTP1</i> | Hs00168310_m1  | 22.88 | 22.16 | 22.96 | 22.82 |
| <i>GSTT1</i> | Hs01091674_m1  | -     | 34.06 | 32.72 | -     |
| <i>GSTZ1</i> | Hs01041668_m1  | 30.89 | 30.15 | 30.66 | 30.81 |

---

*Arylamine N-acetyltransferase*

---

|                                   |                |       |       |       |       |
|-----------------------------------|----------------|-------|-------|-------|-------|
| <i>NAT1</i>                       | Hs00377717_m1  | -     | 34.72 | -     | -     |
| <i>NAT2</i>                       | Hs00605099_m1  | -     | -     | -     | -     |
| <i>SULFO-Transferases</i>         |                |       |       |       |       |
| <i>SULT1A1</i>                    | Hs00738644_m1  | -     | -     | -     | -     |
| <i>SULT1A2</i>                    | Hs02340929_g1* | 32.69 | 32.86 | 31.74 | 31.45 |
| <i>SULT1C2</i>                    | Hs00602560_m1  | -     | 34.02 | 33.73 | 33.77 |
| <i>SULT1C4</i>                    | Hs00198159_m1  | 31.73 | 32.35 | 31.28 | 30.80 |
| <i>SULT2B1</i>                    | Hs00190268_m1  | 29.21 | 28.85 | 29.44 | 28.86 |
| <i>SULT4A1</i>                    | Hs00205005_m1  | -     | -     | -     | -     |
| <i>SULT6B1</i>                    | Hs01376028_m1  | -     | -     | -     | -     |
| <i>UDP- Glycosyl-Transferases</i> |                |       |       |       |       |
| <i>UGT1A1</i>                     | Hs02511055_s1* | 33.07 | 31.88 | 33.42 | 33.71 |
| <i>UGT1A3</i>                     | Hs04194492_g1* | 34.47 | 33.40 | 34.96 | -     |
| <i>UGT1A4</i>                     | Hs01655285_s1* | 34.26 | 33.33 | -     | -     |
| <i>UGT1A6</i>                     | Hs01592477_m1  | 33.60 | 33.06 | -     | -     |
| <i>UGT1A7</i>                     | Hs02517015_s1* | 32.24 | 32.64 | 32.64 | 33.72 |
| <i>UGT1A8</i>                     | Hs01592482_m1  | -     | 34.54 | -     | -     |
| <i>UGT1A9</i>                     | Hs02516855_sH* | 33.94 | 34.14 | 34.11 | -     |
| <i>UGT1A10</i>                    | Hs02516990_s1* | 33.12 | 32.98 | 34.16 | 34.78 |
| <i>UGT2A1</i>                     | Hs00792016_m1  | 31.35 | 33.57 | -     | -     |
| <i>UGT2B4</i>                     | Hs02383831_s1* | -     | 34.24 | -     | 34.83 |
| <i>UGT2B7</i>                     | Hs00426592_m1  | -     | -     | -     | -     |
| <i>UGT2B10</i>                    | Hs02556282_s1* | -     | -     | -     | -     |
| <i>UGT2B15</i>                    | Hs00870076_s1* | -     | -     | -     | -     |
| <i>Carboxyl esterase</i>          |                |       |       |       |       |
| <i>CES1</i>                       | Hs00275607_m1  | 27.66 | 27.19 | 27.44 | 26.69 |
| <i>CES2</i>                       | Hs00187279_m1  | 29.80 | 29.75 | 30.30 | 30.17 |



|                                          |                |       |       |       |       |
|------------------------------------------|----------------|-------|-------|-------|-------|
| <i>CES3</i>                              | Hs00227775_m1  | 30.64 | 29.89 | 33.26 | 32.28 |
| <i>CES4A</i>                             | Hs00545143_m1  | 28.79 | 28.70 | 30.44 | 29.51 |
| <i>CES5A</i>                             | Hs00326937_m1  | -     | -     | -     | -     |
| <hr/> <i>Transcription factors</i> <hr/> |                |       |       |       |       |
| <i>NR1H4</i>                             | Hs00231968_m1  | -     | -     | -     | -     |
| <i>NR1I2</i>                             | Hs00243666_m1  | 33.31 | 33.86 | -     | -     |
| <i>NR1I3</i>                             | Hs00901571_m1  | -     | -     | -     | -     |
| <i>AHR</i>                               | Hs00907322_m1  | 28.39 | 27.95 | 27.66 | 27.31 |
| <i>AHRR</i>                              | Hs00324967_m1  | 34.86 | -     | -     | -     |
| <i>ARNT</i>                              | Hs00231048_m1  | 28.38 | 27.66 | 28.17 | 27.42 |
| <i>AIP</i>                               | Hs00610222_m1  | 27.71 | 26.98 | 27.17 | 26.74 |
| <i>NR3C1</i>                             | Hs00353740_m1  | 28.76 | 27.84 | 27.57 | 27.29 |
| <i>CEBPA</i>                             | Hs00269972_s1* | 29.69 | 28.80 | 28.38 | 28.54 |
| <i>CEBPB</i>                             | Hs00942496_s1* | 26.67 | 25.60 | 25.52 | 24.55 |
| <i>CEBPD</i>                             | Hs00270931_s1* | 27.59 | 26.61 | 26.28 | 25.61 |
| <hr/> <i>Cell specific markers</i> <hr/> |                |       |       |       |       |
| <i>AQP5</i>                              | Hs00387048_m1  | 25.38 | 25.08 | 30.19 | 29.06 |
| <i>CD68</i>                              | Hs00154355_m1  | 26.11 | 26.19 | 24.52 | 24.62 |
| <i>CDH1</i>                              | Hs01023894_m1  | 25.90 | 24.86 | 26.26 | 25.14 |
| <i>CEACAM8</i>                           | Hs00266198_m1  | -     | -     | 34.91 | 33.67 |
| <i>IVL</i>                               | Hs00902520_m1  | 30.89 | 30.15 | 30.66 | 30.81 |
| <i>LCK</i>                               | Hs00178427_m1  | 31.75 | 31.26 | 30.36 | 30.10 |
| <i>MUC5AC</i>                            | Hs01365601_m1  | 26.78 | 27.02 | 34.42 | 34.91 |
| <i>P4HB</i>                              | Hs00168586_m1  | 26.18 | 25.87 | 25.93 | 26.20 |
| <i>PECAM1</i>                            | Hs00169777_m1  | 25.39 | 26.11 | 24.87 | 24.30 |
| <i>PTPRC</i>                             | Hs00894734_m1  | 32.94 | 31.80 | 30.77 | 30.69 |
| <i>SFTPC</i>                             | Hs00161628_m1  | 21.51 | 21.13 | 20.10 | 19.12 |

---

*Housekeeping genes*

---

|              |               |       |       |       |       |
|--------------|---------------|-------|-------|-------|-------|
| <i>18S</i>   | Hs99999901_s1 | 16.29 | 16.92 | 16.71 | 15.89 |
| <i>ACTB</i>  | Hs99999903_m1 | 22.74 | 22.44 | 21.74 | 22.33 |
| <i>B2M</i>   | Hs00984230_m1 | 22.12 | 21.44 | 20.85 | 20.51 |
| <i>RPLP0</i> | Hs99999902_m1 | 23.57 | 23.52 | 23.48 | 23.62 |
| <i>UBC</i>   | Hs00824723_m1 | 24.66 | 24.77 | 25.24 | 24.11 |

Table listing gene, Applied Biosystem assay ID, and median Ct-values for mRNA of drug metabolizing enzymes, transcription factors, cell specific markers, and housekeeping genes in healthy and COPD lung. Median Ct-value of  $\geq 35$  is arbitrary set as cut off value.

SI. Table 3. Gene expression of membrane transporter from healthy and COPD lung in % of expression of Housekeeping genes.

| <i>Gene</i>             | Protein | Healthy |            | COPD    |            |
|-------------------------|---------|---------|------------|---------|------------|
|                         |         | Central | Peripheral | Central | Peripheral |
| <i>ABC-transporters</i> |         |         |            |         |            |
| <i>ABCA1</i>            | ABCA1   | -       | -          | 0.10    | -          |
| <i>ABCA2</i>            | ABCA2   | 3.76    | 7.47       | 1.82    | 2.22       |
| <i>ABCA3</i>            | ABCA3   | 1.00    | 0.83       | 0.76    | 0.48       |
| <i>ABCA4</i>            | ABCA4   | 8.26    | 21.36      | 3.06    | 10.26      |
| <i>ABCA5</i>            | ABCA5   | 0.06    | -          | 0.07    | -          |
| <i>ABCA6</i>            | ABCA6   | 2.63    | 1.43       | 2.46    | 0.99       |
| <i>ABCA7</i>            | ABCA7   | 3.83    | 4.01       | 1.75    | 2.18       |
| <i>ABCA9</i>            | ABCA9   | 0.99    | 0.86       | 0.66    | 0.25       |
| <i>ABCA10</i>           | ABCA10  | 0.61    | 0.39       | 0.52    | 0.40       |
| <i>ABCA12</i>           | ABCA12  | -       | -          | 0.10    | -          |
| <i>ABCB1</i>            | MDR1    | 0.17    | 0.16       | 0.12    | 0.16       |
| <i>ABCB4</i>            | MDR3    | -       | -          | -       | -          |
| <i>ABCB5</i>            | ABCB5   | -       | -          | -       | -          |
| <i>ABCB6</i>            | ABCB6   | 2.72    | 1.64       | 1.55    | 0.56       |
| <i>ABCB7</i>            | ABCB7   | 2.16    | 3.11       | 1.70    | 1.57       |
| <i>ABCB8</i>            | ABCB8   | 1.87    | 2.11       | 1.37    | 0.75       |
| <i>ABCB9</i>            | ABCB9   | 0.29    | 0.18       | 0.16    | 0.10       |
| <i>ABCB10</i>           | ABCB10  | 1.06    | 0.89       | 1.35    | 0.51       |
| <i>ABCC1</i>            | MRP1    | 1.41    | 1.35       | 1.11    | 0.61       |
| <i>ABCC2</i>            | MRP2    | -       | 0.08       | -       | -          |
| <i>ABCC3</i>            | MRP3    | 0.70    | 0.98       | 0.49    | 0.48       |
| <i>ABCC4</i>            | MRP4    | 0.95    | 1.21       | 0.67    | 0.92       |
| <i>ABCC5</i>            | MRP5    | 0.84    | 0.64       | 0.48    | 0.21       |
| <i>ABCC6</i>            | MRP6    | 1.43    | 1.62       | 0.83    | 0.86       |
| <i>ABCC7</i>            | CFTR    | 0.17    | 1.39       | -       | -          |
| <i>ABCC8</i>            | ABCC8   | 1.75    | 2.00       | 0.99    | 1.55       |
| <i>ABCC9</i>            | ABCC9   | 1.41    | 1.35       | 1.11    | 0.61       |
| <i>ABCC10</i>           | MRP7    | 1.28    | 1.30       | 1.25    | 0.43       |
| <i>ABCC11</i>           | MRP8    | -       | -          | -       | -          |
| <i>ABCC12</i>           | MRP9    | -       | -          | -       | -          |

|              |       |      |      |      |      |
|--------------|-------|------|------|------|------|
| <i>ABCG1</i> | ABCG1 | 3.49 | 5.47 | 2.05 | 2.13 |
| <i>ABCG2</i> | BCRP  | 0.14 | 0.09 | 0.08 | 0.15 |
| <i>ABCG4</i> | ABCG4 | -    | -    | -    | -    |
| <i>ABCG5</i> | ABCG5 | -    | -    | -    | -    |
| <i>ABCG8</i> | ABCG8 | -    | -    | -    | -    |

---

*Solute Carriers*

---

|                 |       |      |      |      |      |
|-----------------|-------|------|------|------|------|
| <i>SLC47A1</i>  | MATE1 | 0.40 | 0.85 | 0.31 | 0.92 |
| <i>SLC47A2</i>  | MATE2 | -    | -    | -    | -    |
| <i>SLC15A1</i>  | PepT1 | -    | -    | -    | -    |
| <i>SLC15A2</i>  | PepT2 | 1.96 | 1.08 | 1.43 | 0.75 |
| <i>SLC16A1</i>  | MCT1  | 0.42 | 0.28 | 0.36 | 0.26 |
| <i>SLC16A3</i>  | MCT3  | 0.24 | 0.35 | 0.21 | 0.12 |
| <i>SLC16A4</i>  | MCT4  | 0.88 | 1.04 | 0.75 | 1.09 |
| <i>SLC16A7</i>  | MCT2  | -    | -    | -    | -    |
| <i>SLC19A1</i>  | RFP1  | 0.64 | 1.26 | 0.30 | 0.75 |
| <i>SLC19A2</i>  | THT2  | 2.05 | 1.77 | 0.95 | 1.59 |
| <i>SLC19A3</i>  | THTR2 | 0.53 | 1.07 | 0.34 | 1.33 |
| <i>SLC22A1</i>  | OCT1  | 0.06 | 0.11 | 0.05 | 0.05 |
| <i>SLC22A11</i> | OAT4  | -    | -    | -    | -    |
| <i>SLC22A2</i>  | OCT2  | -    | -    | -    | -    |
| <i>SLC22A3</i>  | OCT3  | 1.06 | 2.43 | 1.01 | 1.84 |
| <i>SLC22A4</i>  | OCTN1 | 1.17 | 0.18 | 1.16 | 0.18 |
| <i>SLC22A5</i>  | OCTN2 | 0.53 | 0.39 | 0.48 | 0.27 |
| <i>SLC22A6</i>  | OAT1  | -    | -    | -    | -    |
| <i>SLC22A7</i>  | OAT2  | -    | -    | -    | -    |
| <i>SLC22A8</i>  | OAT3  | -    | -    | -    | -    |
| <i>SLC22A9</i>  | UST3H | -    | -    | -    | -    |
| <i>SLC28A1</i>  | CNT1  | -    | -    | -    | -    |
| <i>SLC28A2</i>  | CNT2  | -    | -    | -    | -    |
| <i>SLC28A3</i>  | CNT3  | 0.35 | 0.09 | 0.38 | 0.08 |
| <i>SLC29A1</i>  | ENT1  | 5.49 | 5.93 | 2.98 | 3.79 |
| <i>SLC29A2</i>  | ENT2  | 0.39 | 0.44 | 0.30 | 0.26 |
| <i>SLC29A3</i>  | ENT3  | 0.95 | 1.18 | 0.65 | 0.69 |
| <i>SLC29A4</i>  | ENT4  | 0.29 | 0.11 | 0.18 | 0.07 |
| <i>SLC2A1</i>   | GLUT1 | 3.09 | 0.55 | 3.89 | 0.55 |
| <i>SLC31A1</i>  | Ctrl  | 1.48 | 0.62 | 1.52 | 1.01 |
| <i>SLC31A2</i>  | Ctrl  | 3.40 | 5.44 | 2.57 | 4.24 |
| <i>SLC36A4</i>  | PAT4  | 2.09 | 2.12 | 1.17 | 1.16 |

|                |                         |      |      |      |      |
|----------------|-------------------------|------|------|------|------|
| <i>SLC3A2</i>  | 4F2HC                   | 3.27 | 4.44 | 1.98 | 2.11 |
| <i>SLC51A</i>  | OSTalpha                | 0.87 | 0.14 | 1.21 | 0.09 |
| <i>SLC51B</i>  | OSTBETA                 | 0.27 | 0.18 | 0.27 | 0.18 |
| <i>SLC6A14</i> | ATB(0+)                 | 1.70 | 0.96 | 1.49 | 1.59 |
| <i>SLC7A1</i>  | CAT1                    | 2.00 | 1.54 | 2.66 | 0.77 |
| <i>SLC7A5</i>  | LAT1                    | 0.31 | 0.57 | 0.58 | 0.25 |
| <i>SLC7A6</i>  | LAT-2, LAT3,<br>y+LAT-2 | 2.41 | 2.17 | 1.28 | 0.95 |
| <i>SLC7A8</i>  | LAT2, LPI-PC1           | 1.02 | 1.21 | 0.66 | 0.65 |
| <i>SLC7A11</i> | SLC7A11                 | 0.12 | 0.06 | 0.11 | 0.15 |
| <i>SLC6A2</i>  | NAT                     | -    | -    | -    | -    |
| <i>SLC6A3</i>  | DAT                     | -    | -    | -    | -    |
| <i>SLC6A4</i>  | SERT                    | 3.76 | 8.08 | 0.87 | 3.38 |

---

*Solute Carrier Organic Anion Transporters*

---

|                |         |      |      |      |      |
|----------------|---------|------|------|------|------|
| <i>SLCO1A2</i> | OATP1A2 | 0.16 | 0.05 | 0.10 | 0.13 |
| <i>SLCO1B1</i> | OATP1B1 | -    | -    | -    | -    |
| <i>SLCO1B3</i> | OATP1B3 | -    | -    | -    | -    |
| <i>SLCO1C1</i> | OATP1C1 | -    | -    | -    | -    |
| <i>SLCO2B1</i> | OATP2B1 | 3.23 | 7.76 | 2.49 | 7.19 |
| <i>SLCO3A1</i> | OATP3A1 | 0.68 | 0.99 | 0.41 | 0.54 |
| <i>SLCO4A1</i> | OATP4A1 | 2.64 | 6.96 | 0.28 | 0.47 |
| <i>SLCO4C1</i> | OATP4C1 | 0.60 | 0.97 | 0.44 | 0.76 |
| <i>SLCO5A1</i> | OATP5A1 | 0.20 | 0.28 | 0.12 | 0.06 |
| <i>SLCO6A1</i> | OATP6A1 | -    | -    | -    | -    |

---

*Copper Transporters*

---

|              |       |      |      |      |      |
|--------------|-------|------|------|------|------|
| <i>ATP7A</i> | ATP7A | 0.49 | 0.48 | 0.35 | 0.35 |
| <i>ATP7B</i> | ATP7B | 1.41 | 0.84 | 1.29 | 0.43 |

---

Gene expression of membrane transporter from healthy and COPD lung in % of expression of Housekeeping genes. Expression levels correspond to average  $\Delta Ct$  within each group expressed in % of the expression of the mean of the three housekeeping genes 4 (avg HKGs). Expression is calculated as  $(\% \text{ avg HKGs}) = 2^{-(Ct(\text{Gene of interest}) - Ct(\text{avg HKGs}))} \times 100$ . Non detectable (-)  $\% < 0.05$ ; very low (+/-)  $0.05 \leq \% < 0.1$ , low (+)  $0.1 \leq \% < 1$ , moderate (++)  $1 \leq \% < 10$ , high (+++)  $10 \leq \% < 100$ , very high (++++)  $100 \leq \%$ .

SI.Table 4. Inter-individual variability of expressed genes encoding membrane transporters in healthy or COPD human lung in central or peripheral airways.

| Gene                    | Healthy |      |      |            |      |      | COPD    |      |      |            |      |      |
|-------------------------|---------|------|------|------------|------|------|---------|------|------|------------|------|------|
|                         | Central |      |      | Peripheral |      |      | Central |      |      | Peripheral |      |      |
|                         | CV (%)  | High | Low  | CV (%)     | High | Low  | CV (%)  | High | Low  | CV (%)     | High | Low  |
| <i>ABC-transporters</i> |         |      |      |            |      |      |         |      |      |            |      |      |
| <i>ABCA1</i>            | 4.3     | 29.0 | 26.8 | 3.2        | 29.4 | 27.7 | 3.5     | 30.0 | 27.4 | 3.5        | 29.5 | 26.8 |
| <i>ABCA2</i>            | 3.3     | 30.7 | 28.9 | 3.1        | 32.7 | 30.9 | 2.8     | 30.5 | 28.7 | 2.9        | 31.8 | 29.3 |
| <i>ABCA3</i>            | 3.4     | 28.7 | 27.0 | 3.0        | 27.6 | 26.1 | 8.2     | 31.6 | 26.3 | 4.0        | 27.7 | 24.7 |
| <i>ABCA4</i>            | 4.6     | 35.0 | 32.0 |            |      |      | 2.8     | 33.9 | 32.0 |            |      |      |
| <i>ABCA5</i>            | 4.2     | 29.5 | 27.2 | 1.7        | 31.5 | 30.4 | 2.8     | 28.7 | 27.1 | 2.4        | 30.6 | 28.7 |
| <i>ABCA6</i>            | 6.5     | 29.3 | 26.1 | 6.3        | 32.6 | 28.7 | 2.4     | 29.4 | 27.7 | 2.5        | 29.0 | 26.9 |
| <i>ABCA7</i>            | 0.6     | 30.4 | 30.0 | 3.5        | 33.0 | 31.0 | 3.2     | 31.1 | 28.6 | 1.5        | 31.9 | 30.6 |
| <i>ABCA9</i>            | 7.1     | 30.3 | 26.6 | 2.4        | 31.2 | 29.8 | 1.9     | 29.7 | 28.4 | 3.7        | 29.9 | 26.8 |
| <i>ABCA10</i>           | 5.4     | 32.1 | 28.9 | 2.6        | 34.1 | 32.4 | 2.1     | 31.0 | 29.4 | 3.4        | 32.3 | 28.9 |
| <i>ABCA12</i>           | 1.1     | 35.0 | 34.2 |            |      |      | 3.2     | 34.0 | 31.8 |            |      |      |
| <i>ABCB1</i>            | 4.1     | 33.4 | 31.1 | 4.9        | 34.8 | 31.6 | 1.9     | 33.2 | 31.7 | 3.5        | 33.4 | 30.1 |
| <i>ABCB6</i>            | 4.1     | 29.5 | 27.2 | 2.6        | 32.1 | 30.5 | 2.1     | 29.1 | 27.8 | 2.3        | 31.1 | 28.9 |
| <i>ABCB7</i>            | 4.5     | 29.7 | 27.4 | 4.6        | 32.2 | 29.6 | 1.9     | 29.3 | 27.8 | 1.9        | 29.4 | 27.8 |
| <i>ABCB8</i>            | 1.4     | 29.6 | 28.8 | 4.6        | 31.8 | 29.2 | 2.2     | 29.5 | 27.9 | 3.2        | 31.3 | 28.7 |
| <i>ABCB9</i>            | 2.0     | 32.4 | 31.2 | 2.8        | 34.7 | 32.8 | 1.4     | 32.4 | 31.2 | 3.2        | 34.3 | 31.4 |
| <i>ABCB10</i>           | 2.8     | 30.5 | 29.0 | 4.5        | 32.2 | 29.5 | 2.0     | 30.7 | 29.2 | 2.6        | 31.4 | 29.0 |
| <i>ABCC1</i>            | 2.5     | 30.2 | 28.7 | 4.3        | 32.0 | 29.4 | 1.7     | 29.8 | 28.4 | 3.8        | 31.9 | 28.4 |
| <i>ABCC2</i>            |         |      |      | 1.4        | 35.0 | 34.0 |         |      |      |            |      |      |
| <i>ABCC3</i>            | 3.9     | 31.6 | 29.3 | 5.6        | 32.8 | 29.3 | 3.6     | 32.0 | 29.3 | 2.1        | 31.1 | 29.4 |

|               |            |      |      |            |      |      |            |      |      |            |      |      |
|---------------|------------|------|------|------------|------|------|------------|------|------|------------|------|------|
| <i>ABCC4</i>  | <b>4.3</b> | 30.9 | 28.6 | <b>5.1</b> | 31.5 | 28.7 | <b>2.9</b> | 31.0 | 28.8 | <b>2.8</b> | 30.4 | 28.1 |
| <i>ABCC5</i>  | <b>0.2</b> | 30.6 | 30.4 | <b>2.2</b> | 32.5 | 31.0 | <b>2.4</b> | 31.1 | 29.3 | <b>2.8</b> | 32.6 | 30.1 |
| <i>ABCC6</i>  | <b>2.4</b> | 30.8 | 29.4 | <b>3.9</b> | 32.5 | 30.2 | <b>3.5</b> | 31.2 | 28.4 | <b>2.1</b> | 30.2 | 28.6 |
| <i>ABCC7</i>  | <b>5.4</b> | 35.0 | 31.5 | <b>9.0</b> | 35.0 | 29.8 | <b>0.0</b> | 35.0 | 35.0 | <b>0.7</b> | 35.0 | 34.4 |
| <i>ABCC8</i>  | <b>3.5</b> | 30.1 | 28.1 | <b>3.6</b> | 32.4 | 30.2 | <b>2.3</b> | 30.3 | 28.6 | <b>2.4</b> | 29.5 | 27.4 |
| <i>ABCC9</i>  | <b>2.5</b> | 30.2 | 28.7 | <b>4.3</b> | 32.0 | 29.4 | <b>1.7</b> | 29.8 | 28.4 | <b>3.8</b> | 31.9 | 28.4 |
| <i>ABCC10</i> | <b>2.9</b> | 30.4 | 28.7 | <b>3.6</b> | 32.2 | 30.1 | <b>2.4</b> | 29.6 | 27.9 | <b>3.6</b> | 32.4 | 29.2 |
| <i>ABCG1</i>  | <b>1.9</b> | 29.1 | 28.1 | <b>2.3</b> | 29.8 | 28.5 | <b>2.0</b> | 29.1 | 27.6 | <b>3.5</b> | 29.7 | 26.9 |
| <i>ABCG2</i>  | <b>4.8</b> | 34.0 | 31.1 | <b>5.1</b> | 35.0 | 31.8 | <b>3.5</b> | 34.9 | 32.0 | <b>4.4</b> | 34.5 | 30.2 |

*Solute Carriers*

|                |            |      |      |            |      |      |            |      |      |            |      |      |
|----------------|------------|------|------|------------|------|------|------------|------|------|------------|------|------|
| <i>SLC47A1</i> | <b>3.2</b> | 32.2 | 30.2 | <b>6.2</b> | 32.5 | 28.9 | <b>4.0</b> | 32.9 | 29.9 | <b>3.8</b> | 31.2 | 27.6 |
| <i>SLC15A2</i> | <b>3.2</b> | 29.9 | 28.0 | <b>4.1</b> | 31.9 | 29.5 | <b>3.1</b> | 30.0 | 27.9 | <b>3.1</b> | 31.1 | 28.5 |
| <i>SLC16A1</i> | <b>2.6</b> | 32.0 | 30.4 | <b>7.9</b> | 34.2 | 29.5 | <b>1.5</b> | 31.2 | 29.9 | <b>3.2</b> | 32.6 | 29.6 |
| <i>SLC16A3</i> | <b>2.4</b> | 32.6 | 31.2 | <b>5.8</b> | 33.5 | 30.0 | <b>3.4</b> | 33.1 | 30.5 | <b>3.3</b> | 33.7 | 30.9 |
| <i>SLC16A4</i> | <b>4.0</b> | 31.3 | 28.9 | <b>2.1</b> | 32.7 | 31.4 | <b>1.8</b> | 30.3 | 29.0 | <b>3.7</b> | 30.9 | 27.8 |
| <i>SLC19A1</i> | <b>1.5</b> | 31.6 | 30.7 | <b>2.9</b> | 32.6 | 30.8 | <b>4.7</b> | 33.3 | 29.8 | <b>2.2</b> | 30.4 | 28.8 |
| <i>SLC19A2</i> | <b>6.8</b> | 30.4 | 26.9 | <b>2.3</b> | 30.7 | 29.4 | <b>3.0</b> | 30.7 | 28.5 | <b>3.5</b> | 30.0 | 27.4 |
| <i>SLC19A3</i> | <b>3.0</b> | 31.8 | 30.0 | <b>2.6</b> | 32.7 | 31.0 | <b>7.5</b> | 35.3 | 29.3 | <b>2.5</b> | 30.1 | 28.0 |
| <i>SLC22A1</i> | <b>3.9</b> | 34.7 | 32.0 | <b>1.7</b> | 35.0 | 33.9 | <b>1.6</b> | 33.9 | 32.8 | <b>1.8</b> | 34.3 | 32.4 |
| <i>SLC22A3</i> | <b>3.9</b> | 30.7 | 28.6 | <b>5.1</b> | 32.6 | 29.5 | <b>1.5</b> | 29.8 | 28.7 | <b>2.8</b> | 29.5 | 27.3 |
| <i>SLC22A4</i> | <b>4.1</b> | 30.7 | 28.4 | <b>1.1</b> | 34.3 | 33.7 | <b>3.7</b> | 30.2 | 27.9 | <b>6.2</b> | 34.3 | 29.5 |
| <i>SLC22A5</i> | <b>2.6</b> | 31.7 | 30.1 | <b>0.6</b> | 33.3 | 32.9 | <b>2.6</b> | 31.2 | 29.3 | <b>2.7</b> | 32.3 | 29.6 |
| <i>SLC28A3</i> |            |      |      | <b>4.5</b> | 34.7 | 32.0 |            |      |      | <b>3.8</b> | 34.3 | 30.5 |
| <i>SLC29A1</i> | <b>1.7</b> | 28.2 | 27.3 | <b>2.8</b> | 29.7 | 28.3 | <b>2.2</b> | 28.6 | 27.0 | <b>2.6</b> | 28.4 | 26.1 |
| <i>SLC29A2</i> | <b>2.2</b> | 31.9 | 30.6 | <b>8.7</b> | 34.1 | 28.7 | <b>2.5</b> | 32.1 | 30.1 | <b>2.3</b> | 32.0 | 30.2 |
| <i>SLC29A3</i> | <b>3.8</b> | 30.9 | 28.7 | <b>4.7</b> | 32.5 | 29.6 | <b>1.9</b> | 30.7 | 29.3 | <b>3.4</b> | 31.2 | 27.9 |
| <i>SLC29A4</i> | <b>3.3</b> | 32.9 | 30.9 | <b>6.0</b> | 34.8 | 31.1 | <b>1.8</b> | 32.2 | 30.9 | <b>3.6</b> | 35.0 | 31.9 |

|                                                         |            |      |      |             |      |      |             |      |      |            |      |      |
|---------------------------------------------------------|------------|------|------|-------------|------|------|-------------|------|------|------------|------|------|
| <i>SLC2A1</i>                                           | <b>4.5</b> | 29.6 | 27.0 | <b>6.6</b>  | 33.0 | 29.1 | <b>2.3</b>  | 27.9 | 26.5 | <b>4.4</b> | 32.3 | 28.0 |
| <i>SLC31A1</i>                                          | <b>7.1</b> | 31.5 | 27.3 | <b>1.2</b>  | 32.9 | 32.1 | <b>1.6</b>  | 29.1 | 28.1 | <b>3.0</b> | 30.5 | 28.0 |
| <i>SLC31A2</i>                                          | <b>3.7</b> | 29.3 | 27.3 | <b>2.4</b>  | 29.7 | 28.4 | <b>2.6</b>  | 28.8 | 27.2 | <b>2.8</b> | 28.4 | 26.0 |
| <i>SLC36A4</i>                                          | <b>3.8</b> | 29.8 | 27.7 | <b>3.7</b>  | 32.4 | 30.4 | <b>2.2</b>  | 29.9 | 28.2 | <b>2.4</b> | 30.0 | 28.1 |
| <i>SLC3A2</i>                                           | <b>4.4</b> | 29.1 | 26.8 | <b>3.7</b>  | 31.3 | 29.1 | <b>0.9</b>  | 28.6 | 27.9 | <b>4.0</b> | 30.2 | 26.8 |
| <i>SLC51A</i>                                           | <b>3.9</b> | 31.2 | 28.8 | <b>2.5</b>  | 34.2 | 32.6 | <b>1.9</b>  | 29.6 | 28.2 | <b>5.3</b> | 35.0 | 30.6 |
| <i>SLC51B</i>                                           | <b>3.9</b> | 32.7 | 30.4 | <b>6.4</b>  | 34.9 | 30.7 | <b>3.1</b>  | 32.4 | 30.1 | <b>3.4</b> | 33.4 | 30.2 |
| <i>SLC6A14</i>                                          | <b>6.5</b> | 31.1 | 27.3 | <b>3.3</b>  | 31.8 | 29.8 | <b>1.8</b>  | 29.4 | 28.1 | <b>2.9</b> | 29.7 | 27.6 |
| <i>SLC7A1</i>                                           | <b>3.9</b> | 29.9 | 27.7 | <b>2.5</b>  | 32.0 | 30.6 | <b>1.6</b>  | 28.7 | 27.5 | <b>3.0</b> | 31.0 | 28.5 |
| <i>SLC7A5</i>                                           | <b>4.8</b> | 33.1 | 30.2 | <b>0.7</b>  | 32.8 | 32.4 | <b>2.9</b>  | 31.4 | 29.3 | <b>3.5</b> | 32.9 | 29.8 |
| <i>SLC7A6</i>                                           | <b>3.6</b> | 29.6 | 27.6 | <b>3.4</b>  | 32.1 | 30.0 | <b>2.5</b>  | 29.9 | 28.0 | <b>2.6</b> | 30.6 | 28.3 |
| <i>SLC7A8</i>                                           | <b>5.8</b> | 31.4 | 28.0 | <b>8.8</b>  | 33.0 | 27.7 | <b>1.1</b>  | 30.3 | 29.4 | <b>4.0</b> | 32.0 | 28.4 |
| <i>SLC7A11</i>                                          | <b>4.6</b> | 34.5 | 31.6 | <b>4.4</b>  | 35.0 | 32.4 | <b>1.8</b>  | 33.2 | 31.9 | <b>0.9</b> | 32.4 | 31.7 |
| <i>SLC6A4</i>                                           | <b>8.0</b> | 32.1 | 27.9 | <b>6.8</b>  | 31.3 | 27.5 | <b>11.3</b> | 35.0 | 27.0 | <b>8.4</b> | 32.1 | 25.1 |
| <b><i>Solute Carrier Organic Anion Transporters</i></b> |            |      |      |             |      |      |             |      |      |            |      |      |
| <i>SLCO1A2</i>                                          | <b>3.7</b> | 34.7 | 32.6 | <b>4.1</b>  | 34.8 | 32.2 | <b>2.6</b>  | 33.9 | 31.9 | <b>3.6</b> | 35.0 | 31.9 |
| <i>SLCO2B1</i>                                          | <b>4.9</b> | 29.3 | 26.7 | <b>5.8</b>  | 31.4 | 28.0 | <b>6.0</b>  | 30.7 | 26.7 | <b>3.9</b> | 28.0 | 25.0 |
| <i>SLCO3A1</i>                                          | <b>2.6</b> | 31.1 | 29.6 | <b>8.7</b>  | 32.2 | 27.2 | <b>3.4</b>  | 32.2 | 29.4 | <b>2.3</b> | 31.2 | 29.1 |
| <i>SLCO4A1</i>                                          | <b>6.4</b> | 31.6 | 28.2 | <b>14.0</b> | 29.4 | 22.4 | <b>2.6</b>  | 32.2 | 30.0 | <b>3.2</b> | 31.7 | 29.2 |
| <i>SLCO4C1</i>                                          | <b>3.2</b> | 31.6 | 29.7 | <b>11.6</b> | 31.7 | 25.7 | <b>3.2</b>  | 32.0 | 29.4 | <b>3.1</b> | 31.0 | 28.5 |
| <i>SLCO5A1</i>                                          | <b>2.0</b> | 32.8 | 31.7 | <b>10.9</b> | 34.0 | 27.5 | <b>3.2</b>  | 33.7 | 31.3 | <b>3.9</b> | 35.0 | 31.8 |
| <b><i>Copper-Transporting ATPases</i></b>               |            |      |      |             |      |      |             |      |      |            |      |      |
| <i>ATP7A</i>                                            | <b>3.7</b> | 31.8 | 29.7 | <b>0.4</b>  | 32.8 | 32.5 | <b>1.8</b>  | 31.4 | 30.2 | <b>2.5</b> | 31.8 | 29.6 |
| <i>ATP7B</i>                                            | <b>3.7</b> | 30.5 | 28.3 | <b>2.2</b>  | 32.0 | 30.6 | <b>1.4</b>  | 29.3 | 28.4 | <b>2.7</b> | 31.5 | 28.8 |

The inter-individual Variability (CV) among genes encoding membrane transporters in healthy or COPD human lung from both central airways and peripheral tissue. The inter individual variability in gene expression is evaluated by calculation of the coefficient of variation using the CT values (CV = 100x( $\Delta$ Ct standard deviation/mean  $\Delta$ Ct)).



SI. Table 5. Gene expression of drug metabolizing enzymes from healthy and COPD lung in % of expression of Housekeeping genes.

| <b>Genes</b>                   | <b>Protein</b> | <b>Healthy</b> |                   | <b>COPD</b>    |                   |
|--------------------------------|----------------|----------------|-------------------|----------------|-------------------|
|                                |                | <b>Central</b> | <b>Peripheral</b> | <b>Central</b> | <b>Peripheral</b> |
| <i>Cytochrome P450 enzymes</i> |                |                |                   |                |                   |
| <i>CYP1A1</i>                  | CYP1A1         | -              | -                 | -              | -                 |
| <i>CYP1A2</i>                  | CYP1A2         | -              | -                 | -              | -                 |
| <i>CYP1B1</i>                  | CYP1B1         | 1.12           | 0.84              | 1.06           | 1.10              |
| <i>CYP2A6</i>                  | CYP2A6         | 1.00           | 0.36              | 0.15           | 0.06              |
| <i>CYP2A13</i>                 | CYP2A13        | 0.29           | 0.15              | -              | -                 |
| <i>CYP2B6</i>                  | CYP2B6         | 4.26           | 12.26             | 7.61           | 1.49              |
| <i>CYP2C19</i>                 | CYP2C19        | 0.07           | 0.06              | -              | -                 |
| <i>CYP2C9</i>                  | CYP2C9         | 0.11           | 0.09              | -              | -                 |
| <i>CYP2D6</i>                  | CYP2D6         | -              | -                 | -              | -                 |
| <i>CYP2E1</i>                  | CYP2E1         | 0.24           | 0.16              | 0.25           | 0.13              |
| <i>CYP2F1</i>                  | CYP2F1         | 3.28           | 1.56              | 0.23           | 0.18              |
| <i>CYP2J2</i>                  | CYP2J2         | 0.66           | 0.32              | 0.17           | 0.07              |
| <i>CYP2S1</i>                  | CYP2S1         | 1.55           | 1.87              | 0.76           | 0.40              |
| <i>CYP3A4</i>                  | CYP3A4         | -              | -                 | -              | -                 |
| <i>CYP3A5</i>                  | CYP3A5         | 0.08           | -                 | 0.14           | 0.05              |
| <i>CYP4B1</i>                  | CYP4B1         | 63.00          | 32.77             | 20.06          | 24.69             |
| <i>CYP4F2</i>                  | CYP4F2         | -              | -                 | -              | -                 |
| <i>Epoxide hydrolases</i>      |                |                |                   |                |                   |
| <i>EPHX1</i>                   | EPHX1          | 11.14          | 8.71              | 6.19           | 7.51              |

|                                               |       |        |        |        |       |
|-----------------------------------------------|-------|--------|--------|--------|-------|
| <i>EPHX2</i>                                  | EPHX2 | 0.80   | 0.59   | 0.40   | 0.35  |
| <i>EPHX3</i>                                  | EPHX3 | 0.13   | 0.10   | 0.09   | 0.08  |
| <i>EPHX4</i>                                  | EPHX4 | 0.08   | 0.08   | -      | -     |
| <hr/> <i>Flavin monooxygenases</i> <hr/>      |       |        |        |        |       |
| <i>FMO1</i>                                   | FMO1  | 0.09   | 0.06   | -      | -     |
| <i>FMO2</i>                                   | FMO2  | 5.91   | 4.98   | 8.05   | 6.43  |
| <i>FMO3</i>                                   | FMO3  | 0.84   | 0.51   | 0.51   | 0.40  |
| <i>FMO4</i>                                   | FMO4  | 0.28   | 0.23   | 0.13   | 0.15  |
| <i>FMO5</i>                                   | FMO5  | 11.28  | 5.48   | 11.50  | 4.19  |
| <hr/> <i>Glutathione S-Transferases</i> <hr/> |       |        |        |        |       |
| <i>GSTA1</i>                                  | GSTA1 | 10.02  | 7.78   | 0.69   | 2.15  |
| <i>GSTA2</i>                                  | GSTA2 | 3.52   | 1.70   | 0.15   | 0.37  |
| <i>GSTA3</i>                                  | GSTA3 | 0.27   | 0.11   | 0.06   | -     |
| <i>GSTA4</i>                                  | GSTA4 | 1.76   | 1.52   | 2.51   | 1.62  |
| <i>GSTA5</i>                                  | GSTA5 | -      | -      | -      | -     |
| <i>GSTK1</i>                                  | GSTK1 | 12.01  | 11.57  | 8.91   | 8.69  |
| <i>GSTM1</i>                                  | GSTM1 | -      | -      | -      | -     |
| <i>GSTM2</i>                                  | GSTM2 | 2.42   | 2.22   | 3.01   | 1.94  |
| <i>GSTM3</i>                                  | GSTM3 | 1.26   | 0.77   | 1.04   | 0.90  |
| <i>GSTM4</i>                                  | GSTM4 | 0.41   | 0.28   | 0.28   | 0.24  |
| <i>GSTM5</i>                                  | GSTM5 | 0.27   | 0.13   | 0.20   | 0.24  |
| <i>GSTO1</i>                                  | GSTO1 | 3.45   | 3.46   | 4.22   | 5.02  |
| <i>GSTO2</i>                                  | GSTO2 | 0.13   | 0.12   | 0.05   | 0.07  |
| <i>GSTP1</i>                                  | GSTP1 | 152.80 | 140.59 | 101.93 | 66.64 |
| <i>GSTT1</i>                                  | GSTT1 | 0.12   | 0.05   | 0.25   | 0.05  |
| <i>GSTZ1</i>                                  | GSTZ1 | 0.49   | 0.49   | 0.29   | 0.27  |
| <hr/> <i>N-Acetyl-Transferases</i> <hr/>      |       |        |        |        |       |

|                                   |                     |      |      |      |      |
|-----------------------------------|---------------------|------|------|------|------|
| <i>NAT1</i>                       | NAT1                | -    | -    | -    | -    |
| <i>NAT2</i>                       | NAT2                | -    | -    | -    | -    |
| <i>SULFO-Transferases</i>         |                     |      |      |      |      |
| <i>SULT1A1</i>                    | SULT1A1             | -    | -    | -    | -    |
| <i>SULT1A2</i>                    | SULT1A2             | 0.16 | 0.09 | 0.38 | 0.18 |
| <i>SULT1C2</i>                    | SULT1C2             | 0.01 | 0.06 | 0.02 | 0.05 |
| <i>SULT1C4</i>                    | SULT1C4             | 0.37 | 0.16 | 0.41 | 0.25 |
| <i>SULT2B1</i>                    | SULT2B1             | 2.38 | 1.27 | 2.32 | 1.29 |
| <i>SULT4A1</i>                    | SULT4A1             | -    | -    | -    | -    |
| <i>SULT6B1</i>                    | SULT6B1             | -    | -    | -    | -    |
| <i>UDP- Glycosyl-Transferases</i> |                     |      |      |      |      |
| <i>UGT1A1</i>                     | UGT1A1              | 0.15 | 0.45 | 0.13 | 0.03 |
| <i>UGT1A3</i>                     | UGT1A3              | -    | 0.11 | -    | -    |
| <i>UGT1A4</i>                     | UGT1A4              | -    | 0.11 | -    | -    |
| <i>UGT1A6</i>                     | UGT1A6              | -    | 0.07 | -    | -    |
| <i>UGT1A7</i>                     | UGT1A7              | 0.16 | 0.53 | 0.28 | -    |
| <i>UGT1A8</i>                     | UGT1A8              | -    | -    | -    | -    |
| <i>UGT1A9</i>                     | UGT1A9              | 0.06 | 0.19 | 0.08 | -    |
| <i>UGT1A10</i>                    | UGT1A10             | 0.09 | 0.24 | 0.08 | -    |
| <i>UGT2A1</i>                     | UGT2A1              | 0.17 | 0.10 | -    | -    |
| <i>UGT2B4</i>                     | UGT2B4              | -    | -    | -    | -    |
| <i>UGT2B7</i>                     | UGT2B7              | -    | -    | -    | -    |
| <i>UGT2B10</i>                    | UGT2B10             | -    | -    | -    | -    |
| <i>UGT2B15</i>                    | UGT2B15             | -    | -    | -    | -    |
| <i>Carboxylesterases</i>          |                     |      |      |      |      |
| <i>CES1</i>                       | Carboxyl esterase 1 | 7.19 | 3.84 | 5.66 | 4.35 |
| <i>CES2</i>                       | Carboxyl esterase 2 | 0.85 | 0.77 | 0.88 | 0.39 |

|              |                      |      |      |      |      |
|--------------|----------------------|------|------|------|------|
| <i>CES3</i>  | Carboxyl esterase 3  | 0.54 | 0.53 | 0.09 | 0.24 |
| <i>CES4A</i> | Carboxyl esterase 4A | 3.56 | 2.03 | 1.00 | 0.57 |
| <i>CES5A</i> | Carboxyl esterase 5  | -    | -    | -    | -    |

---

Gene expression of drug metabolizing enzymes from healthy and COPD lung in % of expression of housekeeping genes. Expression levels correspond to average  $\Delta Ct$  within each group expressed in % of the expression of the mean of the three housekeeping genes *ACTB*, *B2M*, and *RPLP0* (avg HKGs). Expression is calculated as (% avg HKGs) =  $2^{-(Ct(\text{Gene of interest}) - Ct(\text{avg HKGs}))} \times 100$ . Non detectable (-) % < 0.05; very low (+/-)  $0.05 \leq \% < 0.1$ , low (+)  $0.1 \leq \% < 1$ , moderate (++)  $1 \leq \% < 10$ , high (+++)  $10 \leq \% < 100$ , very high (++++)  $100 \leq \%$ .

SI. Table 6. The inter-individual variability among genes encoding metabolizing enzymes with in healthy or COPD human lung from both central airways and peripheral tissue.

| <i>Gene</i>                    | <b>Healthy</b> |             |            |                   |             |            | <b>COPD</b>    |             |            |                   |             |            |
|--------------------------------|----------------|-------------|------------|-------------------|-------------|------------|----------------|-------------|------------|-------------------|-------------|------------|
|                                | <b>Central</b> |             |            | <b>Peripheral</b> |             |            | <b>Central</b> |             |            | <b>Peripheral</b> |             |            |
|                                | <b>CV (%)</b>  | <b>High</b> | <b>Low</b> | <b>CV (%)</b>     | <b>High</b> | <b>Low</b> | <b>CV (%)</b>  | <b>High</b> | <b>Low</b> | <b>CV (%)</b>     | <b>High</b> | <b>Low</b> |
| <i>Cytochrome P450 enzymes</i> |                |             |            |                   |             |            |                |             |            |                   |             |            |
| <i>CYP1B1</i>                  | <b>8.4</b>     | 32.5        | 28.3       | <b>4.9</b>        | 32.1        | 28.5       | <b>6.9</b>     | 31.8        | 28.2       | <b>7.2</b>        | 32.8        | 28.0       |
| <i>CYP2A13</i>                 | <b>5.0</b>     | 33.0        | 30.0       | <b>5.9</b>        | 35.0        | 30.2       |                |             |            |                   |             |            |
| <i>CYP2A6</i>                  | <b>9.2</b>     | 35.0        | 29.7       | <b>2.7</b>        | 33.1        | 31.1       | <b>4.7</b>     | 35.0        | 32.0       | <b>5.7</b>        | 35.8        | 31.8       |
| <i>CYP2B6</i>                  | <b>3.4</b>     | 29.3        | 27.5       | <b>3.6</b>        | 29.4        | 27.1       | <b>5.1</b>     | 29.8        | 27.0       | <b>2.9</b>        | 30.2        | 28.0       |
| <i>CYP2C9</i>                  | <b>4.4</b>     | 34.3        | 31.5       |                   |             |            |                |             |            |                   |             |            |
| <i>CYP2C19</i>                 | <b>3.7</b>     | 34.5        | 32.3       | <b>2.8</b>        | 35.0        | 32.3       | <b>1.1</b>     | 35.0        | 34.3       | <b>0.0</b>        | 35.0        | 35.0       |
| <i>CYP2E1</i>                  | <b>2.7</b>     | 32.6        | 31.1       | <b>2.7</b>        | 33.9        | 31.4       | <b>0.6</b>     | 32.7        | 32.3       | <b>3.1</b>        | 33.9        | 31.5       |
| <i>CYP2F1</i>                  | <b>7.2</b>     | 29.8        | 26.1       | <b>10.4</b>       | 35.0        | 27.1       | <b>4.8</b>     | 35.0        | 32.1       | <b>8.6</b>        | 35.0        | 29.6       |
| <i>CYP2J2</i>                  | <b>7.4</b>     | 32.2        | 28.3       | <b>5.2</b>        | 34.0        | 29.6       | <b>2.6</b>     | 34.5        | 32.9       | <b>4.2</b>        | 35.0        | 32.2       |
| <i>CYP2S1</i>                  | <b>2.5</b>     | 30.0        | 28.7       | <b>7.0</b>        | 32.4        | 27.3       | <b>3.5</b>     | 31.3        | 29.3       | <b>5.7</b>        | 33.3        | 28.9       |
| <i>CYP3A5</i>                  | <b>5.0</b>     | 35.0        | 31.9       |                   |             |            | <b>2.4</b>     | 34.4        | 32.9       | <b>4.8</b>        | 34.8        | 31.4       |
| <i>CYP4B1</i>                  | <b>5.1</b>     | 25.9        | 23.8       | <b>5.8</b>        | 26.6        | 23.0       | <b>7.8</b>     | 27.1        | 23.6       | <b>3.9</b>        | 26.0        | 23.5       |
| <i>Epoxide hydrolases</i>      |                |             |            |                   |             |            |                |             |            |                   |             |            |
| <i>EPHX1</i>                   | <b>5.8</b>     | 27.6        | 24.8       | <b>6.2</b>        | 29.2        | 25.1       | <b>6.2</b>     | 28.8        | 25.6       | <b>5.4</b>        | 28.7        | 25.4       |
| <i>EPHX2</i>                   | <b>4.3</b>     | 31.4        | 28.9       | <b>6.0</b>        | 33.6        | 28.9       | <b>4.2</b>     | 32.4        | 29.9       | <b>5.5</b>        | 33.5        | 29.3       |
| <i>EPHX3</i>                   | <b>5.2</b>     | 34.1        | 31.0       | <b>3.6</b>        | 34.9        | 31.5       | <b>4.5</b>     | 34.7        | 31.8       | <b>3.0</b>        | 34.3        | 31.7       |
| <i>EPHX4</i>                   | <b>5.2</b>     | 34.8        | 31.5       | <b>3.2</b>        | 35.0        | 32.0       |                |             |            |                   |             |            |
| <i>Flavin monooxygenases</i>   |                |             |            |                   |             |            |                |             |            |                   |             |            |
| <i>FMO1</i>                    | <b>5.8</b>     | 35.0        | 31.4       |                   |             |            | <b>4.1</b>     | 35.0        | 32.5       |                   |             |            |

|                    |            |      |      |            |      |      |            |      |      |            |      |      |
|--------------------|------------|------|------|------------|------|------|------------|------|------|------------|------|------|
| <b><i>FMO2</i></b> | <b>3.9</b> | 28.3 | 26.3 | <b>4.6</b> | 29.2 | 26.3 | <b>4.6</b> | 27.9 | 25.7 | <b>4.8</b> | 28.2 | 25.0 |
| <b><i>FMO3</i></b> | <b>6.1</b> | 31.9 | 28.4 | <b>4.5</b> | 32.5 | 29.1 | <b>4.3</b> | 32.1 | 29.6 | <b>3.4</b> | 32.0 | 29.4 |
| <b><i>FMO4</i></b> | <b>4.1</b> | 32.8 | 30.3 | <b>5.2</b> | 34.7 | 30.5 | <b>4.3</b> | 34.1 | 31.4 | <b>4.8</b> | 34.4 | 30.7 |
| <b><i>FMO5</i></b> | <b>5.8</b> | 28.6 | 25.8 | <b>3.2</b> | 29.1 | 26.8 | <b>3.6</b> | 28.8 | 26.8 | <b>3.1</b> | 28.3 | 26.3 |

---

***Glutathione S-Transferases***

|                     |             |      |      |             |      |      |            |      |      |             |      |      |
|---------------------|-------------|------|------|-------------|------|------|------------|------|------|-------------|------|------|
| <b><i>GSTA1</i></b> | <b>5.9</b>  | 27.9 | 25.0 | <b>10.2</b> | 31.7 | 24.7 | <b>4.6</b> | 31.5 | 29.1 | <b>13.2</b> | 33.2 | 25.9 |
| <b><i>GSTA2</i></b> | <b>7.7</b>  | 29.6 | 25.9 | <b>11.8</b> | 35.0 | 26.1 | <b>5.0</b> | 35.0 | 31.8 | <b>12.7</b> | 36.7 | 28.2 |
| <b><i>GSTA3</i></b> | <b>6.7</b>  | 33.5 | 29.6 | <b>5.7</b>  | 35.0 | 30.5 | <b>1.0</b> | 34.9 | 34.3 | <b>2.5</b>  | 35.0 | 33.1 |
| <b><i>GSTA4</i></b> | <b>4.2</b>  | 29.9 | 27.7 | <b>2.9</b>  | 30.2 | 28.3 | <b>2.9</b> | 29.4 | 27.9 | <b>4.3</b>  | 30.6 | 27.6 |
| <b><i>GSTK1</i></b> | <b>2.4</b>  | 27.0 | 25.8 | <b>6.0</b>  | 28.9 | 25.0 | <b>6.0</b> | 28.3 | 25.4 | <b>3.5</b>  | 27.7 | 25.5 |
| <b><i>GSTM2</i></b> | <b>4.4</b>  | 31.0 | 28.7 | <b>5.7</b>  | 31.3 | 27.0 | <b>4.4</b> | 30.4 | 28.0 | <b>1.8</b>  | 29.2 | 28.0 |
| <b><i>GSTM3</i></b> | <b>6.0</b>  | 31.0 | 27.7 | <b>3.8</b>  | 32.1 | 29.2 | <b>5.2</b> | 31.2 | 28.3 | <b>4.5</b>  | 31.4 | 28.1 |
| <b><i>GSTM4</i></b> | <b>4.2</b>  | 32.3 | 29.8 | <b>4.2</b>  | 33.8 | 30.5 | <b>2.7</b> | 32.7 | 31.1 | <b>3.8</b>  | 33.1 | 30.0 |
| <b><i>GSTM5</i></b> | <b>10.0</b> | 35.2 | 29.3 | <b>3.9</b>  | 34.5 | 31.4 | <b>5.5</b> | 33.7 | 30.4 | <b>4.6</b>  | 33.5 | 29.9 |
| <b><i>GSTO1</i></b> | <b>7.4</b>  | 29.8 | 26.0 | <b>3.7</b>  | 29.1 | 26.5 | <b>6.8</b> | 29.6 | 26.1 | <b>4.6</b>  | 28.7 | 25.7 |
| <b><i>GSTO2</i></b> | <b>5.5</b>  | 34.2 | 30.9 | <b>4.3</b>  | 34.9 | 30.9 | <b>3.9</b> | 35.0 | 32.6 | <b>3.5</b>  | 34.8 | 31.9 |
| <b><i>GSTP1</i></b> | <b>6.5</b>  | 23.7 | 21.0 | <b>7.5</b>  | 25.4 | 21.2 | <b>5.2</b> | 24.4 | 22.1 | <b>7.6</b>  | 25.9 | 21.6 |
| <b><i>GSTT1</i></b> | <b>9.6</b>  | 35.3 | 30.2 |             |      |      | <b>2.7</b> | 32.7 | 31.3 | <b>3.4</b>  | 35.0 | 32.5 |
| <b><i>GSTZ1</i></b> | <b>4.5</b>  | 32.1 | 29.4 | <b>5.6</b>  | 34.0 | 29.4 | <b>5.0</b> | 33.3 | 30.6 | <b>4.3</b>  | 33.3 | 30.0 |

---

***SULFO-Transferases***

|                       |            |      |      |            |      |      |            |      |      |            |      |      |
|-----------------------|------------|------|------|------------|------|------|------------|------|------|------------|------|------|
| <b><i>SULT1A2</i></b> | <b>1.5</b> | 33.5 | 32.6 | <b>3.6</b> | 34.7 | 31.9 | <b>2.4</b> | 32.2 | 30.7 | <b>3.8</b> | 33.6 | 30.7 |
| <b><i>SULT1C2</i></b> |            |      |      | <b>2.5</b> | 35.0 | 32.8 |            |      |      | <b>2.5</b> | 34.6 | 32.6 |
| <b><i>SULT1C4</i></b> | <b>4.2</b> | 32.7 | 30.2 | <b>2.8</b> | 33.3 | 30.9 | <b>2.7</b> | 32.1 | 30.4 | <b>5.3</b> | 33.6 | 29.6 |
| <b><i>SULT2B1</i></b> | <b>4.7</b> | 29.8 | 27.3 | <b>5.2</b> | 31.9 | 28.0 | <b>3.4</b> | 29.5 | 27.8 | <b>5.0</b> | 30.9 | 27.1 |

---

***UDP- Glycosyl-Transferases***

|                       |            |      |      |            |      |      |            |      |      |  |  |  |
|-----------------------|------------|------|------|------------|------|------|------------|------|------|--|--|--|
| <b><i>UGT1A10</i></b> | <b>4.4</b> | 34.7 | 31.9 | <b>2.5</b> | 33.6 | 31.6 | <b>1.5</b> | 35.0 | 34.1 |  |  |  |
| <b><i>UGT1A1</i></b>  | <b>3.7</b> | 33.4 | 31.3 | <b>1.9</b> | 32.3 | 30.7 | <b>2.8</b> | 34.8 | 33.0 |  |  |  |

|                          |            |      |      |            |      |      |            |      |      |            |      |      |
|--------------------------|------------|------|------|------------|------|------|------------|------|------|------------|------|------|
| <i>UGT1A3</i>            |            |      |      | <b>1.4</b> | 34.0 | 32.9 |            |      |      |            |      |      |
| <i>UGT1A4</i>            |            |      |      | <b>1.4</b> | 34.0 | 32.9 |            |      |      |            |      |      |
| <i>UGT1A6</i>            |            |      |      | <b>3.3</b> | 35.0 | 31.8 |            |      |      |            |      |      |
| <i>UGT1A7</i>            | <b>4.5</b> | 33.8 | 31.0 | <b>3.5</b> | 33.0 | 30.2 | <b>2.7</b> | 33.9 | 32.3 |            |      |      |
| <i>UGT1A9</i>            | <b>4.1</b> | 34.7 | 32.1 | <b>3.3</b> | 34.5 | 31.7 | <b>1.6</b> | 35.0 | 34.0 |            |      |      |
| <i>UGT2A1</i>            | <b>5.8</b> | 34.5 | 31.3 |            |      |      | <b>0.0</b> | 35.0 | 35.0 |            |      |      |
| <i>Carboxylesterases</i> |            |      |      |            |      |      |            |      |      |            |      |      |
| <i>CES1</i>              | <b>5.0</b> | 28.1 | 25.7 | <b>5.0</b> | 29.6 | 26.5 | <b>4.7</b> | 28.6 | 26.1 | <b>5.0</b> | 29.2 | 25.7 |
| <i>CES2</i>              | <b>3.1</b> | 31.0 | 29.2 | <b>5.5</b> | 32.8 | 28.4 | <b>2.4</b> | 30.9 | 29.5 | <b>4.6</b> | 32.9 | 29.4 |
| <i>CES3</i>              | <b>2.8</b> | 31.6 | 30.0 | <b>7.3</b> | 35.0 | 29.3 | <b>3.3</b> | 34.3 | 32.1 | <b>3.2</b> | 33.0 | 30.7 |
| <i>CES4A</i>             | <b>4.8</b> | 28.8 | 26.6 | <b>7.6</b> | 32.5 | 26.6 | <b>4.2</b> | 32.5 | 30.2 | <b>5.3</b> | 32.4 | 28.6 |

The inter individual-variability (CV) among genes encoding metabolizing enzymes in healthy or COPD human from both central airways and peripheral tissue. The inter-individual variability in gene expression is evaluated by calculation of the coefficient of variation using the CT values ( $CV = 100 \times (\Delta Ct \text{ standard deviation} / \text{mean } \Delta Ct)$ ).

SI. Table 7. Expression of genes encoding transcription factors from healthy and COPD lung in % of expression of Housekeeping genes.

| <i>Gene</i>  | <i>Protein</i> | <b>Healthy</b> |                   | <b>COPD</b>    |                   |
|--------------|----------------|----------------|-------------------|----------------|-------------------|
|              |                | <b>Central</b> | <b>Peripheral</b> | <b>Central</b> | <b>Peripheral</b> |
| <i>NR1H4</i> | FXR            | -              | -                 | -              | -                 |
| <i>NR1I2</i> | PXR            | 0.10           | -                 | -              | -                 |
| <i>NR1I3</i> | CAR            | -              | -                 | -              | -                 |
| <i>AHR</i>   | AHR            | 2.50           | 2.49              | 2.38           | 3.02              |
| <i>AHRR</i>  | AHRR           | -              | -                 | -              | -                 |
| <i>ARNT</i>  | ARNT           | 4.07           | 2.83              | 4.64           | 2.87              |
| <i>AIP</i>   | AIP            | 5.28           | 3.98              | 5.60           | 4.56              |
| <i>NR3C1</i> | GR             | 3.15           | 2.55              | 3.92           | 3.43              |
| <i>CEBPA</i> | C/EBP $\alpha$ | 1.27           | 1.79              | 2.75           | 1.41              |
| <i>CEBPB</i> | C/EBP $\beta$  | 13.90          | 21.51             | 22.53          | 19.41             |
| <i>CEBPD</i> | C/EBP $\delta$ | 8.40           | 9.05              | 16.56          | 13.73             |

SI. Table 7. Expression of genes encoding transcription factors from healthy and COPD lung in % of expression of Housekeeping genes. Expression levels correspond to average  $\Delta$ Ct within each group expressed in % of the expression of the mean of the three housekeeping genes *ACTB*, *B2M*, and *RPLP0* (avg HKGs). Expression is calculated as (% avg HKGs) =  $2^{-(\text{Ct}(\text{Gene of interest}) - \text{Ct}(\text{avg HKGs}))} \times 100$ . Non detectable (-) % < 0.05; very low (+/-)  $0.05 \leq \% < 0.1$ , low (+)  $0.1 \leq \% < 1$ , moderate (++)  $1 \leq \% < 10$ , high (+++)  $10 \leq \% < 100$ , very high (++++)  $100 \leq \%$ .



SI. Table 8. Expression of genes encoding transcription factors from healthy and COPD lung in % of expression of Housekeeping genes.

| <i>Gene</i>  | <i>Protein</i> | <b>Healthy</b> |                   | <b>COPD</b>    |                   |
|--------------|----------------|----------------|-------------------|----------------|-------------------|
|              |                | <b>Central</b> | <b>Peripheral</b> | <b>Central</b> | <b>Peripheral</b> |
| <i>NR1H4</i> | FXR            | -              | -                 | -              | -                 |
| <i>NR1I2</i> | PXR            | +              | -                 | -              | -                 |
| <i>NR1I3</i> | CAR            | -              | -                 | -              | -                 |
| <i>AHR</i>   | AHR            | ++             | ++                | ++             | ++                |
| <i>AHRR</i>  | AHRR           | -              | -                 | -              | -                 |
| <i>ARNT</i>  | ARNT           | ++             | ++                | ++             | ++                |
| <i>AIP</i>   | AIP            | ++             | ++                | ++             | ++                |
| <i>NR3C1</i> | GR             | ++             | ++                | ++             | ++                |
| <i>CEBPA</i> | C/EBP $\alpha$ | ++             | ++                | ++             | ++                |
| <i>CEBPB</i> | C/EBP $\beta$  | +++            | +++               | +++            | +++               |
| <i>CEBPD</i> | C/EBP $\delta$ | ++             | ++                | +++            | +++               |

Expression of genes encoding transcription factors from healthy and COPD lung in % of expression of Housekeeping genes. Expression levels correspond to average  $\Delta Ct$  within each group expressed in % of the expression of the mean of the three housekeeping genes *ACTB*, *B2M*, and *RPLP0* (avg HKGs). Expression is calculated as  $(\% \text{ avg HKGs}) = 2^{-(Ct(\text{Gene of interest}) - Ct(\text{avg HKGs}))} \times 100$ . Non detectable (-)  $\% < 0.05$ ; very low (+/-)  $0.05 \leq \% < 0.1$ , low (+)  $0.1 \leq \% < 1$ , moderate (++)  $1 \leq \% < 10$ , high (+++)  $10 \leq \% < 100$ , very high (++++)  $100 \leq \%$ .

SI. Table 9. Differential expressed genes encoding metabolizing enzymes between central airways and peripheral tissue.

| <b>Central &gt;Peripheral</b>  | <b>p-Value</b> |
|--------------------------------|----------------|
| 1 <i>GSTZ1</i>                 | 0.0006         |
| 2 <i>GST02</i>                 | 0.0007         |
| 3 <i>CYP2F1</i>                | 0.0010         |
| 4 <i>AQP5</i>                  | 0.0013         |
| 5 <i>CYP2J2</i>                | 0.0019         |
| 6 <i>CYP2S1</i>                | 0.0027         |
| 7 <i>CES4A</i>                 | 0.0029         |
| 8 <i>MUC5AC</i>                | 0.0033         |
| 9 <i>GSTA3</i>                 | 0.0038         |
| 10 <i>FMO4</i>                 | 0.0039         |
| 11 <i>CES3</i>                 | 0.0039         |
| 12 <i>GSTP1</i>                | 0.0047         |
| 13 <i>GSTA1</i>                | 0.0052         |
| 14 <i>CYP2C9</i>               | 0.0062         |
| 15 <i>GSTA2</i>                | 0.0099         |
| <b>Peripheral &gt; Central</b> | <b>p-Value</b> |
| 1 <i>CEBPD</i>                 | 0.0016         |
| 2 <i>PTPRC/CD45</i>            | 0.0028         |
| 3 <i>CEBPA</i>                 | 0.0071         |
| 4 <i>CEBPB</i>                 | 0.0090         |

SI. Table 10. Inter-individual variability of genes encoding transcription factors in healthy or COPD human lung in both central airways or peripheral tissue.

| <i>Gene</i>                  | <b>Healthy</b> |             |            | <b>COPD</b>       |             |            |                |             |            |                   |             |            |
|------------------------------|----------------|-------------|------------|-------------------|-------------|------------|----------------|-------------|------------|-------------------|-------------|------------|
|                              | <b>Central</b> |             |            | <b>Peripheral</b> |             |            | <b>Central</b> |             |            | <b>Peripheral</b> |             |            |
|                              | <b>CV (%)</b>  | <b>High</b> | <b>Low</b> | <b>CV (%)</b>     | <b>High</b> | <b>Low</b> | <b>CV (%)</b>  | <b>High</b> | <b>Low</b> | <b>CV (%)</b>     | <b>High</b> | <b>Low</b> |
| <i>Transcription factors</i> |                |             |            |                   |             |            |                |             |            |                   |             |            |
| <i>AHR</i>                   | <b>5.2</b>     | 29.8        | 27.0       | <b>4.4</b>        | 30.0        | 27.1       | <b>5.6</b>     | 30.2        | 27.4       | <b>3.9</b>        | 29.2        | 26.7       |
| <i>ARNT</i>                  | <b>4.1</b>     | 28.7        | 26.7       | <b>3.0</b>        | 29.3        | 27.4       | <b>2.5</b>     | 28.5        | 27.2       | <b>3.2</b>        | 29.2        | 27.0       |
| <i>AIP</i>                   | <b>4.6</b>     | 28.4        | 26.1       | <b>3.8</b>        | 29.3        | 26.8       | <b>4.7</b>     | 28.6        | 26.2       | <b>4.6</b>        | 29.0        | 25.7       |
| <i>NR3C1</i>                 | <b>4.3</b>     | 29.0        | 26.9       | <b>3.4</b>        | 29.6        | 27.3       | <b>4.4</b>     | 29.1        | 26.8       | <b>3.8</b>        | 29.1        | 26.4       |
| <i>CEBPA</i>                 | <b>2.5</b>     | 30.2        | 28.7       | <b>3.6</b>        | 31.1        | 28.3       | <b>4.2</b>     | 29.6        | 27.3       | <b>4.9</b>        | 30.9        | 27.4       |
| <i>CEBPB</i>                 | <b>6.9</b>     | 27.4        | 24.2       | <b>3.0</b>        | 27.0        | 24.9       | <b>3.4</b>     | 26.3        | 24.6       | <b>4.7</b>        | 26.6        | 23.9       |
| <i>CEBPD</i>                 | <b>5.7</b>     | 27.8        | 25.2       | <b>3.9</b>        | 28.4        | 25.6       | <b>3.6</b>     | 26.8        | 25.0       | <b>4.3</b>        | 27.2        | 24.4       |
| <i>NR1H4</i>                 | <b>0.0</b>     | 35.0        | 35.0       | <b>0.0</b>        | 35.0        | 35.0       | <b>0.0</b>     | 35.0        | 35.0       | <b>0.4</b>        | 35.0        | 34.7       |
| <i>NR1I2</i>                 | <b>3.1</b>     | 34.0        | 32.0       | <b>3.6</b>        | 35.0        | 32.0       | <b>0.0</b>     | 35.0        | 35.0       | <b>2.6</b>        | 35.0        | 33.1       |

The inter-individual variability (CV) of genes encoding transcription factors. The inter individual variability in gene expression is evaluated by calculation of the coefficient of variation using the CT values ( $CV = 100 \times (\Delta Ct \text{ standard deviation} / \text{mean } \Delta Ct)$ ).

SI. Table 11. Expression of genes encoding cell specific markers in % of expression of Housekeeping genes.

| <i>Marker</i>             | <i>Gene</i>    | <i>Protein</i>                                                    | <b>Healthy</b> |                   | <b>COPD</b>    |                   |
|---------------------------|----------------|-------------------------------------------------------------------|----------------|-------------------|----------------|-------------------|
|                           |                |                                                                   | <b>Central</b> | <b>Peripheral</b> | <b>Central</b> | <b>Peripheral</b> |
| Epithelial cells          | <i>CDH1</i>    | <i>E-Cadherin</i>                                                 | 20.60          | 22.54             | 18.13          | 13.00             |
| Type I cells              | <i>AQP5</i>    | Aquaporin 5                                                       | 15.28          | 15.15             | 1.46           | 1.00              |
| Type II cells             | <i>SFTPC</i>   | surfactant protein C                                              | 352.85         | 360.85            | 1121.72        | 942.96            |
| Goblet cells              | <i>MUC5AC</i>  | mucin 5AC oligomeric mucus/gel-forming                            | 10.17          | 7.03              | 0.10           | 0.48              |
| Squamous cells            | <i>IVL</i>     | <i>Involucrine</i>                                                | -              | -                 | -              | -                 |
| Hematolymphoid cells      | <i>PTPRC</i>   | Protein tyrosine phosphatase receptor type C (CD45)               | 0.14           | 0.22              | 0.41           | 0.37              |
| Granulocytes              | <i>CEACAM8</i> | Carcinoembryonic antigen-related cell adhesion molecule 8 (CD66b) | -              | -                 | -              | 0.06              |
| Lymphocytes               | <i>LCK</i>     | Tyrosine-protein kinase Lck                                       | 0.23           | 0.32              | 0.32           | 0.31              |
| Monocytes/<br>macrophages | <i>CD68</i>    | Cluster of Differentiation 68                                     | 10.09          | 11.14             | 28.54          | 21.71             |
| Endothelial cells         | <i>PECAMI</i>  | platelet/endothelial cell adhesion molecule (CD31)                | 28.61          | 14.97             | 49.67          | 30.93             |
| fibroblasts               | <i>P4HB</i>    | prolyl 4-hydroxylase beta polypeptide                             | 11.04          | 9.79              | 7.73           | 6.43              |

Expression of genes encoding cell specific markers in % of expression of Housekeeping genes. Expression levels correspond to average  $\Delta C_t$  within each group expressed in % of the expression

of the mean of the three housekeeping genes *ACTB*, *B2M*, and *RPLP0* (avg HKGs). Expression is calculated as  $(\% \text{ avg HKGs}) = 2^{-(\text{Ct}(\text{Gene of interest}) - \text{Ct}(\text{avg HKGs}))} \times 100$ . Non detectable (-)  $\% < 0.05$ ; very low (+/-)  $0.05 \leq \% < 0.1$ . low (+)  $0.1 \leq \% < 1$ . moderate (++)  $1 \leq \% < 10$ . high (+++)  $10 \leq \% < 100$ . very high (++++)  $100 \leq \%$ .

SI. Table 12. Expression of genes encoding cell specific markers in % of expression of Housekeeping genes.

| <i>Marker</i>             | <i>Gene</i>    | <i>Protein</i>                                                    | <b>Healthy</b> |                   | <b>COPD</b>    |                   |
|---------------------------|----------------|-------------------------------------------------------------------|----------------|-------------------|----------------|-------------------|
|                           |                |                                                                   | <b>Central</b> | <b>Peripheral</b> | <b>Central</b> | <b>Peripheral</b> |
| Epithelial cells          | <i>CDH1</i>    | <i>E-Cadherin</i>                                                 | +++            | +++               | +++            | +++               |
| Type I cells              | <i>AQP5</i>    | Aquaporin 5                                                       | +++            | +++               | ++             | +                 |
| Type II cells             | <i>SFTPC</i>   | surfactant protein C                                              | ++++           | ++++              | +++++          | +++               |
| Goblet cells              | <i>MUC5AC</i>  | mucin 5AC. oligomeric mucus/gel-forming                           | +++            | ++                | +/-            | +                 |
| Squamous cells            | <i>IVL</i>     | <i>Involucrine</i>                                                | -              | -                 | -              | -                 |
| Hematolymphoid cells      | <i>PTPRC</i>   | Protein tyrosine phosphatase. receptor type. C (CD45)             | +              | +                 | +              | +                 |
| Granulocytes              | <i>CEACAM8</i> | Carcinoembryonic antigen-related cell adhesion molecule 8 (CD66b) | -              | -                 | -              | +/-               |
| Lymphocytes               | <i>LCK</i>     | Tyrosine-protein kinase Lck                                       | +              | +                 | +              | +                 |
| Monocytes/<br>macrophages | <i>CD68</i>    | Cluster of Differentiation 68                                     | +++            | +++               | +++            | +++               |
| Endothelial cells         | <i>PECAMI</i>  | platelet/endothelial cell adhesion molecule (CD31)                | +++            | +++               | +++            | +++               |
| fibroblasts               | <i>P4HB</i>    | prolyl 4-hydroxylase. beta polypeptide                            | +++            | ++                | ++             | ++                |

Expression of genes encoding cell specific markers in % of expression of Housekeeping genes. Expression levels correspond to average  $\Delta Ct$  within each group expressed in % of the expression of the mean of the three housekeeping genes *ACTB*, *B2M*, and *RPLP0* (avg HKGs). Expression is calculated as  $(\% \text{ avg HKGs}) = 2^{-(Ct(\text{Gene of interest}) - Ct(\text{avg HKGs}))} \times 100$ . Non detectable (-) % < 0.05;

very low (+/-)  $0.05 \leq \% < 0.1$ . low (+)  $0.1 \leq \% < 1$ . moderate (++)  $1 \leq \% < 10$ . high (+++)  $10 \leq \% < 100$ . very high (++++)  $100 \leq \%$ .

SI. Table 13. Inter-individual variability among genes encoding cell specific markers within healthy or COPD human lung in both central airways and peripheral tissue.

| <i>Gene</i>                  | <b>Healthy</b> |             |            |                   |             |            | <b>COPD</b>    |             |            |                   |             |            |
|------------------------------|----------------|-------------|------------|-------------------|-------------|------------|----------------|-------------|------------|-------------------|-------------|------------|
|                              | <b>Central</b> |             |            | <b>Peripheral</b> |             |            | <b>Central</b> |             |            | <b>Peripheral</b> |             |            |
|                              | <b>CV (%)</b>  | <b>High</b> | <b>Low</b> | <b>CV (%)</b>     | <b>High</b> | <b>Low</b> | <b>CV (%)</b>  | <b>High</b> | <b>Low</b> | <b>CV (%)</b>     | <b>High</b> | <b>Low</b> |
| <i>Cell specific markers</i> |                |             |            |                   |             |            |                |             |            |                   |             |            |
| <i>AQP5</i>                  | <b>7.2</b>     | 27.8        | 24.3       | <b>8.8</b>        | 30.4        | 24.8       | <b>5.5</b>     | 31.4        | 28.3       | <b>11.7</b>       | 35.0        | 27.0       |
| <i>CD68</i>                  | <b>3.8</b>     | 27.5        | 25.6       | <b>7.9</b>        | 28.8        | 24.4       | <b>5.4</b>     | 26.3        | 23.9       | <b>4.8</b>        | 26.6        | 23.6       |
| <i>CDH1</i>                  | <b>3.7</b>     | 26.1        | 24.4       | <b>4.3</b>        | 27.0        | 24.1       | <b>4.0</b>     | 26.6        | 24.8       | <b>3.9</b>        | 27.1        | 24.7       |
| <i>CEACAM8</i>               | <b>0.0</b>     | 35.0        | 35.0       | <b>3.4</b>        | 35.0        | 32.7       | <b>0.6</b>     | 35.0        | 34.6       | <b>5.5</b>        | 35.0        | 30.9       |
| <i>IVL</i>                   |                |             |            |                   |             |            |                |             |            |                   |             |            |
| <i>LCK</i>                   | <b>3.1</b>     | 32.9        | 30.9       | <b>2.9</b>        | 32.3        | 30.1       | <b>6.2</b>     | 33.4        | 30.1       | <b>6.6</b>        | 34.1        | 29.1       |
| <i>MUC5AC</i>                | <b>3.2</b>     | 27.2        | 25.6       | <b>19.5</b>       | 37.8        | 24.9       | <b>7.3</b>     | 36.1        | 31.6       | <b>13.1</b>       | 35.0        | 27.6       |
| <i>P4HB</i>                  | <b>5.9</b>     | 27.8        | 24.8       | <b>4.9</b>        | 28.8        | 25.4       | <b>5.5</b>     | 28.4        | 25.9       | <b>5.3</b>        | 28.7        | 25.2       |
| <i>PECAM1</i>                | <b>5.6</b>     | 26.7        | 24.0       | <b>3.9</b>        | 27.2        | 24.6       | <b>1.4</b>     | 24.9        | 24.3       | <b>6.5</b>        | 27.1        | 23.3       |
| <i>PTPRC</i>                 | <b>4.9</b>     | 34.0        | 31.0       | <b>5.2</b>        | 34.1        | 30.2       | <b>4.3</b>     | 32.5        | 29.9       | <b>4.7</b>        | 32.7        | 29.0       |
| <i>SFTPC</i>                 | <b>7.5</b>     | 23.9        | 20.9       | <b>26.6</b>       | 31.5        | 19.9       | <b>7.7</b>     | 21.0        | 18.3       | <b>6.7</b>        | 21.5        | 18.3       |

Inter-individual variability (CV) of genes encoding cell specific markers in healthy or COPD human lung both central airways and peripheral tissue. The inter-individual variability in gene expression is evaluated by calculation of the coefficient of variation using the CT values ( $CV = 100 \times (\Delta Ct \text{ standard deviation} / \text{mean } \Delta Ct)$ ).



**SLC51A**  
 $p=0.0009$

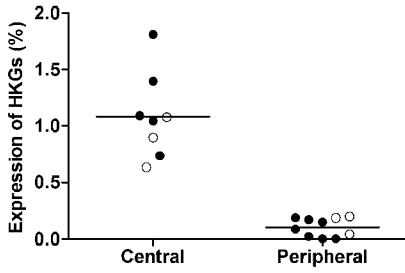

**ABCA4**  
 $p=0.0017$

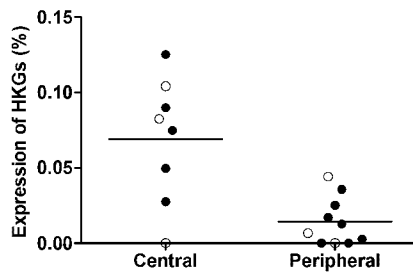

**SLC15A2**  
 $p=0.0018$

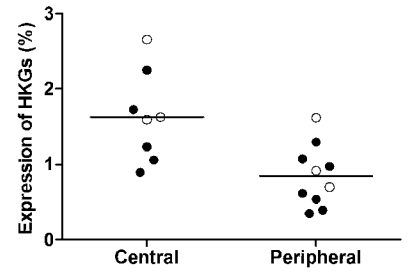

**ATP7B**  
 $p=0.0030$

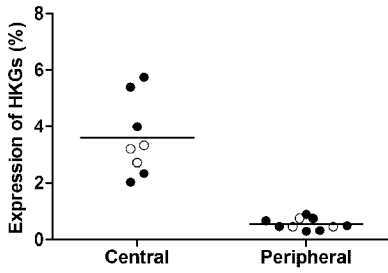

**ABCB6**  
 $p=0.0030$

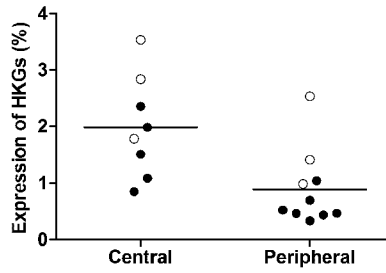

**ABCA5**  
 $p=0.0031$

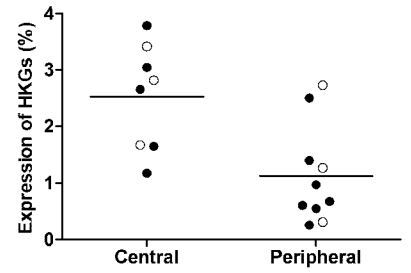

**SLC31A1**  
 $p=0.0071$

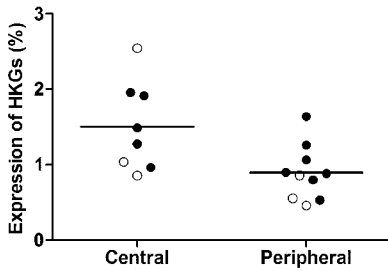

**SLC7A1**  
 $p=0.0087$

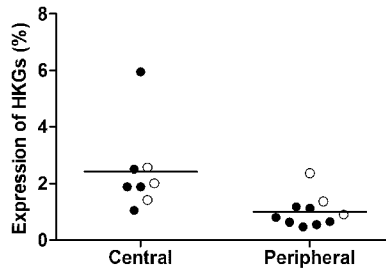

**SLCO4C1**  
 $p=0.0017$

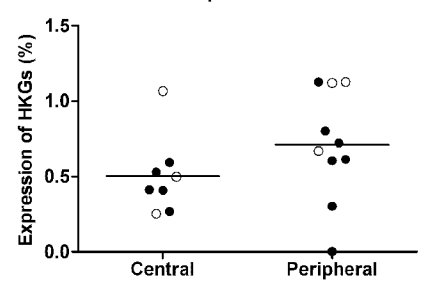

**SLCO2B1**  
 $p=0.0025$

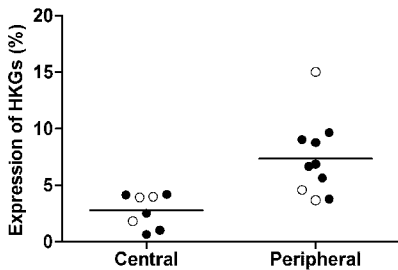

**ABCA3**  
 $p=0.0039$

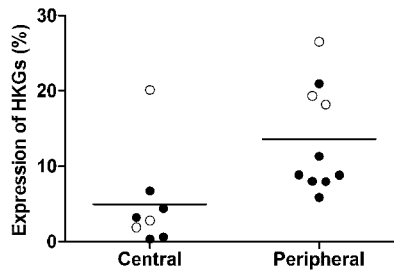

**ABCC4**  
 $p=0.0092$

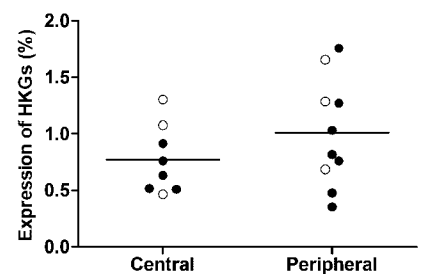

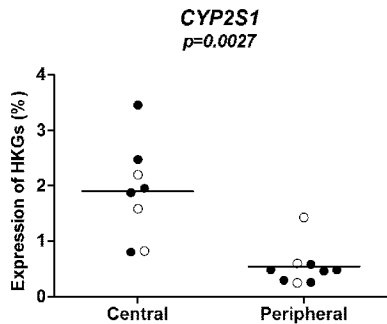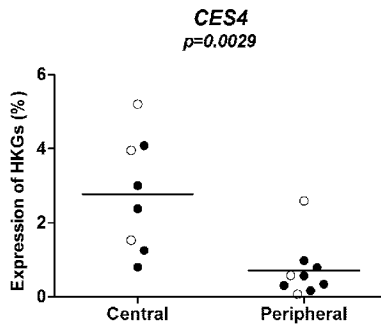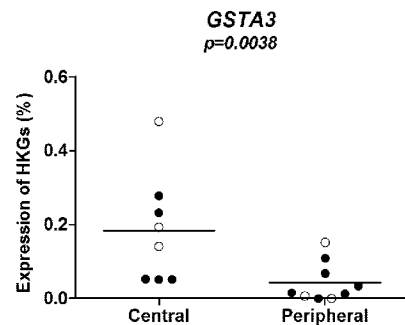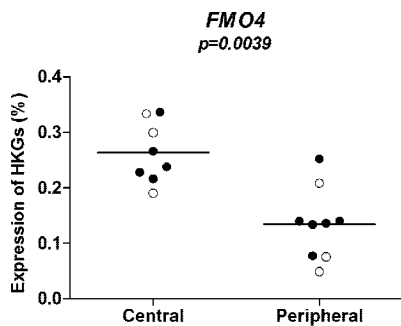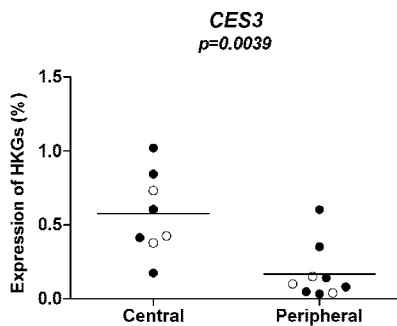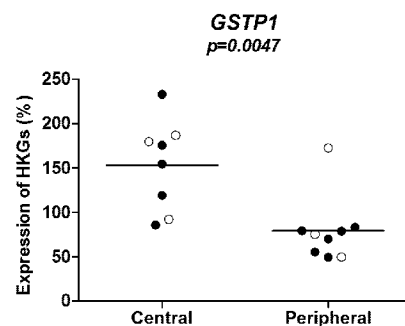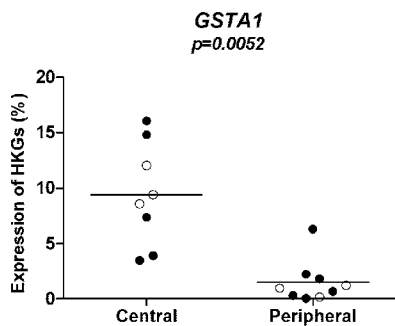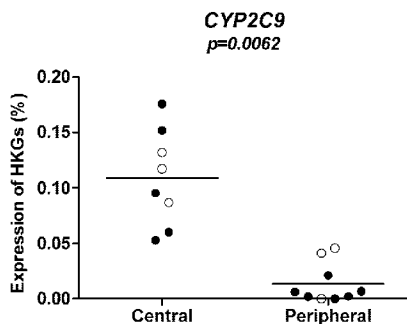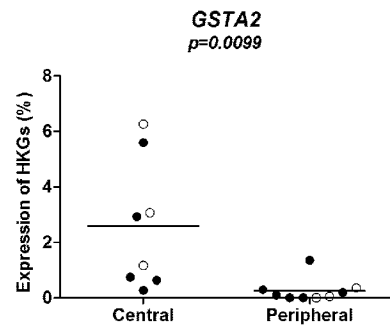

Supplement: prp20002-e00054-SD1.pdf [file prp20002-e00054-SD1.pdf]
